# A prescriptive optimization approach to identification of minimal barriers for surgical patients

Taghi Khaniyev<sup>\*†</sup>, Martin S. Copenhaver<sup>†§</sup>, Kyan C. Safavi<sup>†§</sup>, Ana Cecilia Zenteno Langle<sup>†</sup>, Keren S. Starobinski<sup>†</sup>, Bethany Daily<sup>†</sup>, Peter Dunn<sup>†§</sup>, and Retsef Levi<sup>‡</sup>

<sup>\*</sup>Department of Industrial Engineering, Bilkent University, Ankara, Turkey

<sup>†</sup>Massachusetts General Hospital, Boston MA

<sup>§</sup>Harvard Medical School, Boston MA

<sup>‡</sup>Sloan School of Management, Massachusetts Institute of Technology, Cambridge MA

Contact: [taghi.khaniyev@bilkent.edu.tr](mailto:taghi.khaniyev@bilkent.edu.tr)

Ensuring timely patient discharges is central to managing a hospital’s patient flow; however, discharges are dependent on the coordination of multiple care teams and thus are highly decentralized in nature. Many large hospitals have established capacity management centers to centrally direct and inform flow and support clinical teams across the hospital system, but they often lack transparency into what are the actionable, high-yield barriers to discharge that they need to focus on to be most effective. Moreover, these barriers are patient-specific and context-dependent, i.e., a patient’s clinical-operational context determines what issues must be resolved and with which urgency. In this study, we leverage a machine learning model that predicts which patients are likely to be discharged in the next 24 hours together with a mixed-integer prescriptive optimization model to identify a subset of issues called *minimal barriers* that stand in the way of discharging a patient. Such barriers balance two aims: a high likelihood that the patient will be discharged from the hospital in the next 24 hours if these barriers are resolved; and a high likelihood that these barriers will indeed be resolved. We empirically demonstrate the efficacy of the proposed formulation and solution methodology in identifying a small number of minimal barriers using real data from a large academic medical center.

---

## 1. Introduction

Large hospitals often operate at or near maximum capacity, thereby experiencing significant congestion and delays in patient care. Ensuring smooth patient flow in such settings requires central capacity management teams to maintain a delicate balance between hospital admissions (inflow) and discharges (outflow). The inflow of admissions of new patients is a relatively transparent process that can be centrally tracked. Elective admissions (e.g., elective surgeries or chemotherapy administration) are known in advance, and even unscheduled admissions through the emergency department (ED) or hospital-to-hospital transfers require a submission of a bed request to a central admitting department. In contrast, the process of discharging patients from the hospital is usually highly decentralized and requires coordination of resources across numerous role groups,

making it opaque to capacity planners. Furthermore, frequent delays in the discharge process lead to congestion in critical upstream areas like the ED and the operating rooms (Copenhaver et al. 2019).

The challenge of ensuring timely discharges involves multiple dimensions. First, there is a high degree of heterogeneity across patients due to their clinical characteristics as well as non-clinical factors such as the availability of social support. Second, the discharge management of care is often spread across different groups of care providers (e.g., physicians and nursing teams) and other professionals (e.g., case managers and social workers). Each of these groups may have a different perspective with respect to the readiness of a patient to be discharged from the hospital. The resulting lack of central transparency can lead to the suboptimal allocation of resources that are essential to the discharge of patients. For example, the discharge of a patient may depend on a diagnostic test, but the prioritization of the respective resources is often unaware that the specific patient’s discharge depends on such a resource. These problems are further compounded by scale—a large hospital system typically has to manage hundreds of patient admissions and discharges each day.

To effectively address such a large-scale, high-impact operational problem calls for a systematic data-driven approach which requires, first and foremost, a structured and interpretable representation of each patient’s clinical and administrative status throughout their hospitalization. In earlier work, Safavi et al. (2019) introduced the terminology of *barriers to discharge* to dynamically represent the list of issues (e.g., “abnormal lab results”, “issues with mobility”, or “patient awaiting placement at a facility”) that could potentially stand in the way of discharging a patient. Retrospective analysis shows, however, that not all barriers of a patient are resolved before discharge; in other words, their resolution may not be necessary for discharge. Moreover, even among the barriers that are resolved before discharge, there may be some whose resolutions were not necessary for discharge. Conceptually, this suggests that there exists a subset of *minimal barriers* whose collective resolution constitutes the minimal effort to enable a patient’s discharge. Our goal is to identify the minimal barriers (i.e., approximately necessary and sufficient) for a given patient so that they can potentially be resolved earlier than they would have been without any intervention.

### **1.1. Approach—Discharge Prediction, Resolution Likelihood, and Minimal Barriers**

To solve this problem, we proceed in three steps. First, we leverage (with some modifications) an existing neural network modeling approach (Safavi et al. 2019) which can accurately predict how likely a patient is to be discharged within the next 24 hours as a function of different clinical and administrative features. We then change the input and output representation of the model in a way that allows us to provide clinically interpretable model predictions. Specifically, for the

input representation, we propose a framework to dynamically represents a patient's clinical and administrative characteristics throughout her hospitalization in terms of what barriers to discharge are active and resolved. If we consider a patient's data as a combination of *static* features (such as age and sex) which do not change during the hospitalization, and dynamic features (such as blood pressure and mobility status), new barriers can be *triggered* (e.g., patient being placed on intravenous narcotics), and remain *open* until they are subsequently *resolved* (the patient being taken off of intravenous narcotics). For the output representation, using the discharge likelihoods predicted by the model, we categorize patients by their discharge readiness: those highly likely to be discharged, those unlikely to be discharged, and those "maybe" patients for whom discharge could potentially be facilitated by resolving specific barriers. The concept of barriers is central to how care teams approach the day-to-day management of inpatients, making the model's output easily interpretable and actionable.

Second, we use this input representation to train another set of machine learning models predicting, for each existing barrier of a patient, the likelihood it will be resolved prior to discharge. This step is critical given the complex, personalized nature of barriers which is influenced by several attributes, such as frequency (how often a barrier is triggered in the population), overall resolution likelihood (how often that barrier is resolved amongst those for whom it is triggered), and the workload burden (the amount of work required to resolve the barrier prior to discharge). Intuitively, this step assesses whether the respective barrier is necessary for the patient's discharge.

Finally, these predictive models are subsequently combined with a mixed integer optimization model to answer the following question: among a patient's numerous barriers, does there exist a small subset of those barriers which balances the likelihood that such barriers are resolved prior to discharge *and* the increased likelihood of discharge for that patient *given that those barriers are resolved*? We call this the *minimal barriers* (MIN) identification problem. Intuitively, among a patient's currently open barriers, the MIN should be defined as those which are both necessary and sufficient for discharge. That is, they are likely to be resolved prior to discharge, and a patient's discharge is likely to occur given that these barriers are resolved.

The central modeling challenge posed by such a problem is that this is not merely about prediction, as the outcome (a patient's discharge) is dependent on actions (the resolution of barriers) which may or may not take place. Understanding and addressing this question is a critical step in achieving the broader aim of developing a transparent, centralized, scalable, and effective discharge process for hospitalized patients. Although the framework outlined above is more broadly applicable, in this work we limit our focus to surgical inpatients, i.e., patients who are cared for by a surgical service and require hospitalization following their surgical procedure. One would need to create additional clinical barriers that are relevant for the patient population of interest by working with subject-matter experts from that clinical domain.

## 1.2. Contributions

Our main contributions can be summarized as follows:

1. Using the barriers framework, we develop machine learning models to predict, for each patient and each of their open barriers, the likelihood of the barrier’s resolution by the time of discharge.
2. We incorporate these predictions into a prescriptive mixed integer optimization model that identifies which barriers of a patient, if resolved, are most effective to increase discharge timeliness. By jointly optimizing for both discharge likelihood and barrier resolution likelihood, we are able to select a small set of realistic and impactful barriers. We also develop a scalable iterative approach to solve this problem that finds optimal solutions for each patient in seconds.
3. Finally, we present a detailed empirical assessment using real patient data to illustrate the effectiveness of the approach in identifying actionable patients and their respective MIN for surgical inpatients at a large academic medical center. In doing so, we discuss how to calibrate our approach to identify a practically reasonable number of patients and barriers. We also show that our personalized barrier resolution likelihood approach is superior to a naïve approach that does not incorporate such information. Further, we show that our approach is practically tractable for the problem sizes of interest in practice. Lastly, we connect our work to recent developments in prescriptive optimization to show how our framework generalizes beyond the neural-network setting.

**Implications for Practice:** This study has several practical implications for hospital capacity management. As hospitals increasingly focus on creating centralized management (such as capacity coordination centers), the modeling and algorithmic framework and tools we have created significantly enhance the ability to prioritize patients and specific actions per patient:

1. *Categorize patients by discharge readiness:* we classify patients into three groups by discharge readiness—those highly likely to be discharged, those unlikely to be discharged, and those “maybe” patients for whom discharge could potentially be facilitated by resolving specific barriers. At full scale, this enables us to focus attention on only 20-30 patients on a given day among hundreds hospitalized, for each of whom a small number of minimal barriers needs to be identified.
2. *Identify a small subset of barriers:* by incorporating the likelihoods that a patient’s barriers will be resolved prior to discharge, we are able to identify a small subset of barriers that both require resolution and for which resolution is likely to result in discharge. (As we demonstrate in Section 3, incorporating this likelihood is critical to identify a practical set of barriers to focus on.)

3. *Enable barrier-specific interventions*: finally, this prescriptive framework allows hospitals to pursue targeted, barrier-specific interventions. For example, the subset of patients identified as having a magnetic resonance imaging (MRI) barrier to discharge (per the prescriptive model) could be prioritized for such imaging. Absent such information, it can be difficult for teams managing a limited number of MRI machines to make strategic decisions about how best to prioritize the use of such resources across all patients requiring that service.

While the focus of our work is on hospitalized surgical patients, we believe this framework is broadly applicable outside of hospital operations and healthcare. The fundamental question we address is as follows:

*What is the best way to increase the predicted likelihood of a specified outcome by modifying certain features under consideration while taking into account the likelihood such features must change prior to that specific outcome or the cost associated with changing such features?*

This has natural analogues in settings like revenue management (e.g., modeling the probability of purchase with costs associated with a variety of possible intervention strategies) and supply chain resilience (e.g., identifying interventions to decrease risk of various failures across the system). Finally, while we focus on a setting in which the core underlying model is a neural network, our framework is more broadly applicable (we discuss this in depth later).

### 1.3. Related Literature

Our research is closely related to existing research in healthcare operations, interpretable machine learning, causal inference (particularly treatment personalization), and combinatorial multi-armed bandits. We briefly summarize the connections to such work and how our work differs.

**Healthcare operations:** Inpatient capacity management and patient flow planning has been studied from a variety of perspectives. Conforti et al. (2011) and Gartner and Kolisch (2014) look at the problem from a hospital resource allocation perspective and employ mathematical models to maximize patient flow and contribution margins, respectively, while ensuring each patient goes through their respective clinical pathway. From inpatient bed capacity management perspective, some studies such as Kim et al. (2014), McCoy et al. (2018) focus on predicting total discharge volume on a given day while others such as Liu et al. (2010), Azari et al. (2012), Morton et al. (2014) focus on predicting length-of-stay (LOS) for each individual patient. There has also been work to understand discharge readiness as it progresses through a patient's hospitalization, both manually (De Grood et al. 2016) and using machine learning (Levin et al. 2012, Barnes et al. 2016, Safavi et al. 2019). In the present study, we extend our work Safavi et al. (2019) in which we developed a neural network model to predict discharge likelihoods for surgical inpatients. We use this underlying model as one input in our novel prescriptive approach while also incorporating additional information about how likely a specific barrier is to be resolved by the time of discharge.

**Interpretable machine learning:** Machine learning (ML) algorithms, able to process substantial electronic clinical and operational data, offer an opportunity to create systematic, scalable, and accurate predictions of which patients will be discharged (Temple et al. 2015, Karhade et al. 2018, Van Walraven and Forster 2017). These algorithms, however, must be combined with an interpretable clinical representation to create an output that helps guide the clinical discharge processes. Rajkomar et al. (2018) proposed an automatized patient representation which analyze electronic health records (EHRs) and construct relevant features in an unsupervised way. They demonstrate that deep learning methods using this representation are capable of accurately predicting multiple medical events such as readmission, prolonged length of stay from multiple centers without site-specific data harmonization. In contrast, Bertsimas et al. (2020b) construct an expertise-driven patient representation on top of EHR data and apply an optimal classification tree machine learning approach to predict several aspects of patient flow such as mortality and discharge within 24 hours; they argue that the black-box nature of deep learning models impedes adoption from doctors and caregivers which are not engaged in the modeling process.

There has been a variety of work to explain black-box models (e.g., Ribeiro et al. 2016). However, these frameworks typically account only for which features contribute to the current prediction score, and as such, they do not answer the decision-making problem of “what interventions should be made (i.e., barriers resolved) such that a desired outcome is achieved?” Fischetti and Jo (2018) and Anderson et al. (2020a) tackle this problem by answering the question “what is the minimal subset of features that needs to be modified in order to change the currently predicted class?” They present MIP formulations for high-dimensional piecewise linear functions that correspond to trained neural networks. Anderson et al. (2020a) demonstrate the effectiveness of their approach in a well-known benchmark image classification problem. From methodological point of view, the work of Anderson et al. (2020a) is the closest to the framework we are presenting in this study. Their approach, however, lacks a few key characteristics to be applicable to the problem of identifying MIN. First, they assume changing each feature is equally costly/likely to happen. In the context of identifying MIN, the likelihood of each barrier’s resolution is an important parameter to take into account. Ignoring this aspect has the potential to output a solution that includes barriers which, if resolved, could significantly improve the patient’s score, but is very unlikely to be resolved. Secondly, they also assume that all features can be modified independently of one another, whereas the way we design our feature space ties the values of pairs of trigger and resolution features to each other according to precedence relationships and does not allow making changes to the static features. This is an important characteristic that needs to be taken into account in order to generate feasible solutions in our setting.

**Personalized Treatments:** In the causal inference literature, the *Potential Outcomes Framework* (Rubin 2005) is often used to quantify the causal effect of a treatment for a given patient by comparing the potential outcomes. The standard framework was developed for a binary treatment (i.e., treatment or control), and has been adapted for multiple discrete or continuous treatments since. Recent approaches such as Shalit et al. (2017) and Bica et al. (2020) use machine learning to estimate personalized potential outcome function from historical observational data containing both contextual features and a treatment feature. In our setting, resolution of an open barrier could be thought of as a “treatment.” A major challenge with directly adapting such techniques here is that there are typically multiple (potentially tens of) open barriers for a given patient and more than one of them could require resolution prior to discharge (note, though, that there are some recent literature on multi-arm personalized treatment problems, e.g., Bertsimas et al. 2016, 2020a).

**Combinatorial Multi-armed Bandits:** Lastly, the class of *combinatorial multi-armed bandit* problems (CMAB) from reinforcement and online learning problems (Chen et al. 2016) share some similarities with our approach. In CMAB, the objective in each round is to choose a subset of base arms (collectively called a *super arm*) in a way that maximizes the expected gain. It is assumed that each arm’s properties are only partially known and may become better understood in the subsequent rounds only by choosing that arm. A variant of the problem is called Contextual CMAB (CC-MAB) which incorporates side information associated with each arm in each round (Chen et al. 2018). The exploitation phase of the CC-MAB problem resembles our problem very closely in that it allows personalization (via context features) and combinatorial selection of multiple arms. The key difference, however, is that they assume that the reward function (or the expected outcome) is a known submodular function of the played arms, whereas in our case, the expected outcome function is not known explicitly and must be learned from historical data.

#### 1.4. Paper Structure

The remainder of the paper is structured as follows: we begin Section 2 by describing the discharge prediction model adopted from Safavi et al. (2019) followed by the changes we made to the model to make it amenable for the subsequent prescriptive optimization model. In Section 2.2, we formally define the notion of barriers and describe the trigger-resolution framework to dynamically represent barriers. Next, in Section 2.3, we introduce the predictive models for barrier resolution likelihood, and subsequently incorporate the predictive models into a prescriptive optimization model in Section 2.4 to identify the minimal barriers. Section 3 includes detailed empirical results when the prescriptive approach is applied to data from a large academic medical center. In Section 4, we draw some final conclusions.

## 2. Modeling Approach

In earlier work, Safavi et al. (2019) trained machine learning models to reliably predict whether a given patient will be discharged from the hospital within the next 24 hours. Such a predictive model takes as its input a variety of clinical and administrative data extracted from a hospital's EHR and provides a prediction score (in  $[0, 1]$ ) as its output which can be interpreted as the likelihood that the patient will be discharged within 24 hours. They tested three commonly used machine learning algorithms (logistic regression, classification trees, and neural networks) with their respective hyperparameters optimized and ultimately selected a feed-forward neural network (with a single hidden layer with 100 nodes) which outperformed the others across all evaluation metrics.

Data elements included in their study were structured, including either numerical values (e.g., laboratory results) or multiple choice of predetermined text phrases (e.g., diet descriptions within diet orders). A summary of data included is shown in Table SM1 in the Supplemental Material. Inclusion of a data source was determined based on (i) whether the clinical care teams currently use it to evaluate a patient's discharge readiness, (ii) the reliability of the data, and (iii) the consistency of usage by different services. From the data included, they extracted two types of features: *static* and *dynamic*. The static features,  $\mathbf{s}$ , refer to the elements that do not change throughout the same hospitalization (e.g., age, sex), while dynamic features are those that can change (e.g., whether patient is receiving intravenous narcotics). The first dynamic feature they used denoted the current length of stay,  $d$ , expressed as the number of days elapsed since admission. To further represent a patient's dynamic status, they introduced the concept of barriers. A barrier could be specific to a type of surgical procedure or generalizable across multiple types of surgical procedures. A list of 149 potential barriers were identified in Safavi et al. (2019) by a multidisciplinary team that included physicians, nurses, case managers, physical therapists, and nutritionists.

We note that Safavi et al. (2019) also uses the term milestone to represent a patient's dynamic status. In the subsequent sections, we opted for using a single term, *barrier*, for simplicity since not having achieved a milestone can be interpreted as a barrier. We used the same data sources (consequently, the same list of barriers) as in Safavi et al. (2019), but needed to make a number of changes to the feature representation and the discharge prediction model they proposed in order to make it amenable for a prescriptive optimization approach. We next describe these changes.

### 2.1. Changes Made to the Discharge Prediction Model

**Data:** To conduct our study, we use data from a 1019-bed academic medical center where more than 36,000 surgical procedures are performed annually. We include all adult inpatients (aged 18 years or older) who had a surgical procedure completed during their hospitalization, were cared for



by a surgical team on an inpatient floor during their hospitalization, and were discharged between May 1, 2016, to September 30, 2019. Overall during the study period, there were 52,724 unique hospitalization episodes with average length of stay of 4.45 days. To mimic how a prescriptive model might work in practice (with clinical databases updated once daily shortly after midnight), we capture data at a daily level. In particular, for a given patient on a given day, we use all data collected prior to that day (i.e., until 23:59 on the day prior). This time was used because the clinical and administrative database is updated every 24 hours, starting at 23:59. Therefore, our central unit of observation is a patient-day pair, and our outcome of interest is whether the patient was discharged within 24 hours (i.e., on that calendar day). The predictive models discussed subsequently, predict, for each patient, in each day they are in the the hospital. During the study period, the average number of patients on which the models predicted was 188.2, amounting to overall 234,649 patient-day pairs. The average number of discharges per day was 42.3. At the outset, we split the data into three sets: training (60%), validation (20%), and testing (20%). All results presented later are based on test set (out-of-sample) performance based on models built using the training and validation data. To create these sets, we did sampling stratified by patient encounter, so that any given hospitalization only occurs within one of the three data sets. This study was conducted with approval from the hospital's Institutional Review Board.

**Model Input and Performance:** For the purposes of this study, we also trained the same three models (logistic regression, classification trees, and neural networks) as in Safavi et al. (2019) using a modified feature vector representation which transforms dynamic data into features using a trigger-resolution framework where each barrier is represented by a pair of binary features. Dynamic representation of barriers in the feature vector is detailed in Section 2.2. Performance of the models (shown in the Supplementary Material Table SM2) were similar to the ones reported in Safavi et al. (2019). Given its superior discriminative performance (as measured by area under the receiver-operator characteristic curve, or *AUC*), the neural network model was implemented in practice at our institution and therefore we use this model structure as the basis of the discharge prediction part of our approach.

**Model Output:** Next, to better reflect clinical and operational ambiguity in discharge predictions, we convert the continuous prediction score into three discrete predictions (as opposed to two); in particular, instead of a binary YES or NO prediction, a third MAYBE category is also used, and the groups are defined as follows (given discharge prediction score  $s$ ):

$$\text{predict} \begin{cases} \text{NO}, & s \in [0, S_-) \\ \text{MAYBE}, & s \in [S_-, S_+] \\ \text{YES}, & s \in (S_+, 1] \end{cases}$$

where  $S_-$  and  $S_+$  fixed thresholds are defined so that the NO and YES categories have high negative and positive predictive power (NPV/PPV), respectively. Precisely,

**Table 1** Test sample discharge prediction categories and comparison of actual discharge times

| Prediction category | # (%) of Observations | Leave within 24 hours | Leave in 24-48 hours | Leave after 48 hours |
|---------------------|-----------------------|-----------------------|----------------------|----------------------|
| NO                  | 28146 (59.2%)         | 1379 (4.9%)           | 3434 (12.2%)         | 23333 (82.9%)        |
| MAYBE               | 14024 (29.5%)         | 5171 (36.9%)          | 3702 (26.4%)         | 5151 (39.7%)         |
| YES                 | 5370 (11.3%)          | 4072 (75.8%)          | 845 (15.7%)          | 453 (8.40%)          |

- $S_-$  was chosen so that 95% of the (training sample) predictions that fall under NO category were not discharged within 24 hours (NPV=95%); and
- $S_+$  was chosen so that 75% of the predictions that fall under YES category were discharged within 24 hours (PPV=75%).

These percentages were based on clinical input about tradeoffs of making the respective predictions. Based on the training and validation data, we set the thresholds as  $S_- = 0.17$  and  $S_+ = 0.62$ . The performance of these choices on the test data is shown in Table 1.

Note that the YES and NO categories make up of approximately 70% of all predictions. Moreover, these two correspond informally to “leave within 24 hours” and “leave after 48 hours,” respectively. On the other hand, most of the patients who leave between 24-48 hours fall under the MAYBE category. Combining this with the insight from Safavi et al. (2019) that “false positive patients without a clinical reason to stay are typically discharged within 24 to 48 hours”, the MAYBE category roughly corresponds to the potentially actionable patients for the purposes of saving bed-days. **Therefore, we hypothesized that the Maybe patients would be the most prevalent patients to have specific MIN identified;** we perform a detailed assessment of this hypothesis in Section 3.

**Calibration:** A critical notion for the meaningful interpretation of clinical prediction models in practice is that of model *calibration* (Huang et al. 2020, Steyerberg 2019). For a predictive model  $h : F \rightarrow [0, 1]$ , where  $F$  is the feature space and the observed outcome data is a binary  $y \in \{0, 1\}$ , model calibration requires assessing how well  $h(\mathbf{x})$  estimates  $\mathbb{P}(y = 1|\mathbf{x})$ , i.e., the probability that  $y = 1$  given feature vector  $\mathbf{x} \in F$ . There are numerous approaches to assessing model calibration. For our purposes, we follow one of the common approaches based on the *Brier score* for  $h$  (Huang et al. 2020). For a set of data  $D = \{(\mathbf{x}_i, y_i)\}_{i=1}^n \subseteq F \times \{0, 1\}$ , it is defined as

$$\text{Brier}_D(h) := \frac{1}{n} \sum_i (y_i - h(\mathbf{x}_i))^2.$$

Lower Brier scores typically correspond to better calibration for a given prediction task.

In order to assess whether a given model  $h$  is properly calibrated on a data set  $D$ , we apply the Spiegelhalter  $Z$ -test (Huang et al. 2020). In particular, a model is defined as calibrated per a Spiegelhalter test (at the 0.05 level) if  $\text{Spieg}_D(h) \leq 1.96$ , where

$$\text{Spieg}_D(h) := \left| \frac{\sum_i (y_i - h_i)(1 - 2h_i)}{\sqrt{\sum_i (1 - 2h_i)^2 h_i (1 - h_i)}} \right|,$$

and  $h_i := h(\mathbf{x}_i)$ . We chose to apply this definition because it is easy to use in settings where many models are being tested and where it is not feasible to visually inspect usual calibration plots; indeed, this is important in the subsequent section on barrier resolution models. (Note that Spiegelhalter tests are sometimes interpreted via  $p$  values instead. In particular, a  $p$  value can be found by computing  $p = 2 \cdot \Phi(-\text{Spieg}_D(h))$ , where  $\Phi$  is the cumulative density function of a standard normal; therefore, calibration corresponds precisely with failing to reject the null at a significance level of 0.05.)

Given this definition, we verified that the discharge prediction model (as defined above) is properly calibrated on the training set. The Brier scores of this model on the training, validation, and testing sets were 0.104, 0.110, and 0.110, respectively; a calibration plot is shown in Figure SM1. The model was *not* calibrated per a Spiegelhalter test on the validation nor testing sets. However, we believed the comparable Brier scores and visual inspection of the calibration plots suggested the models were sufficient and so we did not apply any modifications (such as Platt scaling or isotonic regression) to the model after the fact.

## 2.2. Dynamic Representation of Barriers

We represent the dynamic status of a patient’s barriers by using a trigger-resolution framework where each barrier is encoded by a pair of binary features: (1) a trigger feature that marks whether the barrier has been activated during the hospitalization; and (2) a resolution feature that signals whether the barrier has been resolved. Figure 1 provides an illustrative example of how the trigger-resolution framework could be used to capture the dynamic state of a patient from the moment the patient is admitted and until discharge.

Each vertical block in Figure 1 represents a single day during the hospitalization. The first horizontal block illustrates the events’ trigger and resolution timeline. Each type of event (e.g., diet, physical therapy, medication, etc.) is marked with a different number, when it is triggered (white rectangles), and when it is resolved (gray circles). The second horizontal block lists the event descriptions denoted by the rectangles and circles in the block above. Finally, the third horizontal block illustrates the feature vector representation of the patient for each day during the hospitalization. Entire feature vector  $\mathbf{x}_i = (\mathbf{s}_i, d_i, \mathbf{t}_i, \mathbf{r}_i)$  of observation  $i$  is composed of four components as described above: *static*, *days since admission*, *trigger*, and *resolution* features, respectively. In this

Figure 1 Example timeline of a total knee replacement patient's hospitalization

|                           | DAY 0                                                                                                                                |   |   | DAY 1                                                                             |   | DAY 2                                                                                           |   |   |   | DAY 3                                                                                      |   |   |                                                                                   |  |  |
|---------------------------|--------------------------------------------------------------------------------------------------------------------------------------|---|---|-----------------------------------------------------------------------------------|---|-------------------------------------------------------------------------------------------------|---|---|---|--------------------------------------------------------------------------------------------|---|---|-----------------------------------------------------------------------------------|--|--|
| <b>TRIGGER</b>            | 1                                                                                                                                    | 2 | 3 |                                                                                   |   | 4                                                                                               | 5 | 6 | 7 |                                                                                            |   |   |                                                                                   |  |  |
| <b>RESOLUTION</b>         |                                                                                                                                      |   |   | 1                                                                                 | 2 |                                                                                                 |   |   |   | 3                                                                                          | 5 | 7 |                                                                                   |  |  |
| <b>EVENT DESCRIPTIONS</b> | 1: Nonregular diet<br>2: PT order placed<br>3: IV Narcotics                                                                          |   |   | 1: Regular diet<br>2: PT sees the patient<br>4: Suction drain                     |   | 5: Facility referral placed<br>6: Abnormal cardiac rhythm<br>7: Cardiology consult order placed |   |   |   | 3: PO Narcotics<br>5: Rehab facility accepts the patient<br>7: Cardiology sees the patient |   |   |                                                                                   |  |  |
| <b>FEATURE VECTOR</b>     | $\begin{pmatrix} s_1, s_2, s_3, s_4; \\ d; \\ t_1, t_2, t_3, t_4, t_5, t_6, t_7; \\ r_1, r_2, r_3, r_4, r_5, r_6, r_7 \end{pmatrix}$ |   |   | $\begin{pmatrix} 0,1,1,0; \\ 0; \\ 1,1,1,0,0,0,0; \\ 0,0,0,0,0,0,0 \end{pmatrix}$ |   | $\begin{pmatrix} 0,1,1,0; \\ 1; \\ 1,1,1,1,0,0,0; \\ 1,1,0,0,0,0,0 \end{pmatrix}$               |   |   |   | $\begin{pmatrix} 0,1,1,0; \\ 2; \\ 1,1,1,1,1,1,1; \\ 1,1,0,0,0,0,0 \end{pmatrix}$          |   |   | $\begin{pmatrix} 0,1,1,0; \\ 3; \\ 1,1,1,1,1,1,1; \\ 1,1,1,0,1,0,1 \end{pmatrix}$ |  |  |

specific example, the static features are illustrated by the first four binary values  $(s_1, s_2, s_3, s_4) = (0, 1, 1, 0)$ . For the purposes of illustration, let us assume that these features represent, respectively, “whether the patient’s sex is *Female*”, “whether the patient’s age is over 65”, “whether the patient had a knee replacement surgery”, and “whether the patient is on a Cardiology service floor”. Observe that these four features do not change throughout the hospitalization, as expected. The number of days since admission is denoted by  $d$  on the second line of the feature vector and is incremented by 1 each day. Finally, the third and fourth lines in the feature vector indicate whether each barrier (seven of them illustrated in this example) is triggered and resolved, respectively.

According to Figure 1, right after the surgery, the patient was unable to have a regular (oral) diet, had a need to be seen by a physical therapist (PT), and was on intravenous (IV) narcotics. On the next day, two of the barriers from the previous day (i.e., diet and PT consult) were resolved, but a new one was introduced as a suction drain was placed. On Day 2, several other barriers were introduced. The patient was assessed to need a post acute care facility after discharge, hence a referral to facility was placed awaiting for acceptance. Moreover, patient appeared to have some heart issues indicated by an abnormal cardiac rhythm. As a result, a consult order to Cardiology was placed. On the third and last day, patient was taken off of the IV narcotics and started on oral (PO) narcotics for the pain. A rehab facility accepted the patient and a cardiology specialist saw the patient.

It can be seen from the barriers representation on the Day 3 that the patient was discharged without two of the triggered barriers resolved: “Suction drain” and “Abnormal cardiac rhythm.” This may seem like an anomaly, but in fact it is not unusual with surgical patients. Depending on which cohort a patient belongs to (type of surgery, age, post acute care need, etc.), the resolution of

a barrier may not be necessary for discharge. In this example, the patient is discharged to a rehab facility where the patient will continue to receive professional medical care, which means as long as it did not constitute a major immediate problem for the patient (which may be inferred from a cardiologist signing off after the consult), a cardiac rhythm issue could be kept under control at the next care facility. Similarly, the suction drain can be removed at a later time, if, for example, the patient is discharged to a rehab facility. Thus, in itself, the fact the suction was not removed does not mean necessarily that the patient could not be discharged. In fact, our analysis shows that, on average, only about 42.7% of the barriers which get triggered at some point during the hospitalization of the patient get resolved by the time of discharge. This highlights the importance of identifying the barriers that are critical and necessary for patient's discharge. Identifying this subset of necessary and sufficient barriers among many barriers that might be triggered is key to enabling a proactive approach to facilitating discharges.

Table 2 illustrates the heterogeneity in barrier occurrences and resolutions for a subset of ten barriers. Specifically, observe that some barriers such as “pending physical therapy (PT) discharge disposition recommendation,” “irregular diet,” and “on intravenous narcotics” occur in many patients, while others mostly occur only in a smaller fraction (for example, only 1.4% of patients have an “on heparin” barrier during their hospitalization). There is also heterogeneity in the percentage of patients for which the respective barrier is resolved prior to discharge. The data in Table 2 imply that not all barriers are equally likely to be resolved prior to discharge. Moreover, the importance of a barrier's resolution for a patient's discharge is not identical across different patients, specifically, for some the barrier might be critical to allow discharge, whereas for others it might not prevent the discharge. Taking this heterogeneity into account, in the next subsection, we train a new set of predictive models to predict, for a given patient, how likely an open barrier of the patient is to be resolved prior to discharge.

### **2.3. Barrier Resolution Prediction Models**

The feature vector described in Section 2.2 is designed to represent a patient's current status, including their barriers. Therefore, by extracting the feature vector for each (historical) patient at their time of discharge, we can construct a binary outcome vector where each element represents whether the patient was discharged with the respective barrier resolved. The availability of this historical data allows us to train a model for each barrier to predict whether an open barrier of a patient will be resolved by the time of discharge. This requires training a resolution prediction model for each barrier included in the model. To develop such models, we first filtered out the barriers which occurred in fewer than 1000 observations in the combined training and validation sets (i.e., approximately 0.5% of observations) or were resolved less than 5% of the time, in order

**Table 2** Ten barriers and their respective out-of-sample summary statistics. “Patient level” indicates the percentage of patients for whom the barrier was triggered (and subsequently resolved prior to discharge), while “Patient-day level” provides the percentage of hospital days for which the barrier was activated and then the percentage where it was resolved (after activated first).

| Barrier                                             | Patient level |            | Patient-day level |            | Resolution model |             |
|-----------------------------------------------------|---------------|------------|-------------------|------------|------------------|-------------|
|                                                     | % triggered   | % resolved | % open            | % resolved | AUC              | Brier score |
| Pending Physical Therapy’s discharge recommendation | 97.5          | 44.9       | 61.2              | 44.1       | 0.80             | 0.18        |
| On oral narcotics                                   | 70.2          | 22.6       | 49.6              | 21.1       | 0.73             | 0.15        |
| Irregular diet                                      | 59.2          | 59.0       | 44.8              | 41.2       | 0.87             | 0.14        |
| On intravenous narcotics                            | 58.2          | 78.9       | 23.9              | 82.7       | 0.81             | 0.11        |
| Urinary catheter                                    | 41.5          | 84.3       | 25.2              | 79.9       | 0.78             | 0.12        |
| On oxygen device                                    | 37.4          | 91.8       | 24.1              | 80.6       | 0.78             | 0.13        |
| No urine occurrence                                 | 34.2          | 86.0       | 17.0              | 82.0       | 0.86             | 0.10        |
| Awaiting post-hospital facility acceptance          | 15.0          | 79.8       | 19.0              | 81.9       | 0.76             | 0.12        |
| Chest tube                                          | 10.0          | 93.5       | 7.1               | 93.0       | 0.73             | 0.06        |
| On heparin                                          | 1.4           | 93.2       | 0.5               | 92.7       | 0.82             | 0.06        |

to ensure sufficient data. After this initial filtering step, the barrier list was reduced from 146 to 103.

At this stage, our goal for each barrier was to build a model that predicted, for any observation (patient-day) with that barrier open, whether that barrier is resolved by the time of discharge (given the patient’s current feature vector). Our primary objective in doing so was to create models with high discriminative power with respect to the resolution outcome (i.e., high AUC) while ensuring that the models were appropriately calibrated on the training/validation sets. In particular, for each of the 103 barriers we performed the following:

1. On the subset of the training data with that barrier open, we train a sequence of  $\ell_1$ -regularized logistic regression models. In particular, we use `glmnet` (Friedman et al. 2010) to compute the regularization path for regularization parameters  $\lambda_1 > \lambda_2 > \dots > \lambda_{\min} > 0$  (we use the default automated grid choice and remove any  $\ell_2$  regularization). Using the parameter  $\lambda_{1se}$  corresponding to the parameter for the model within one standard error of that with the lowest cross-validation error (as performed only based on the training set), we exclude any models with  $\lambda < \lambda_{1se}$ . (The  $\lambda_{1se}$  choice is based on standard practice recommendations, cf. Hastie et al. 2009.) This results in a set of regularized logistic regression models  $M_{\lambda_1}, \dots, M_{\lambda_{1se}}$ . We assume that we have  $K$  such models (i.e.,  $|\{\lambda_1, \dots, \lambda_{1se}\}| = K$ ).
2. We also train  $K$  ordinary logistic regression models  $U_{\lambda_1}, \dots, U_{\lambda_{1se}}$  defined as follows: for each model  $M_\lambda$  on the regularization path, we identify the set of nonzero variables for that model and train an ordinary (unregularized) logistic regression model (again with outcome being whether the barrier is resolved) but only on the subset of features for which the corresponding

- coefficient in  $M_\lambda$  is nonzero. (The motivation for training such unregularized models as well in this setting is that regularization is known to potentially adversely affect model calibration.)
3. For the set of  $2K$  logistic regression models, we exclude any models with validation AUC below 0.5; we also exclude any models which fail to calibrate per a Spiegelhalter test (either on the training data or on the validation data). Among the remaining models, we pick the one that maximizes  $\text{AUC}_{\text{val}} - \text{Brier}_{\text{val}} - \max\{\text{AUC}_{\text{train}} - \text{AUC}_{\text{val}}, 0\}$ , where  $\text{AUC}_D$  denotes the AUC on data set  $D$ . The motivation for this choice is that we simultaneously want to maximize validation AUC while minimizing Brier score and controlling the imbalance between the training and validation AUCs.

Based on this process, there were 7 barriers for which there are no calibrated logistic regression models with validation AUC above 0.5; we excluded these, resulting in a final 96 barriers and their corresponding prediction models (the final list of barriers can be found in SM4). Therefore, for each observation, we can obtain the personalized barrier resolution likelihood vector, denoted  $\mathbf{L} \in [0, 1]^{96}$ , by concatenating the prediction scores of all resolution prediction models ( $L_j$  represents the resolution likelihood for barrier  $j$ ; the dependence on the observation is omitted for readability). Table 2 includes the AUC and Brier score for a sample of 10 of these barriers. Further discussion of the relationship between the number of observations with a given barrier and out-of-sample AUC is included in the Supplemental Material.

Having trained the discharge prediction model and the barrier resolution prediction models, we next describe how these predictive models can be leveraged to formulate and solve the MIN problem, which in turn can be used to inform decisions on which barriers to target for each patient.

#### 2.4. Prescriptive Model — Identifying Minimal Barriers

As was highlighted in Section 2.2, not all barriers of a patient are resolved prior to discharge. Moreover, among the barriers that are resolved before discharge, there may be some whose resolutions were not necessary for discharge. Conceptually, this suggests that there exists a subset of barriers (we call them *minimal barriers*, or MIN) whose collective resolution constitutes the minimal effort to enable a patient’s discharge. Our goal is to identify such a set of barriers.

To define our objective, we start with an idealized model. In particular, for a subset  $S$  of a patient’s current barriers, let  $\mathbb{P}_{\text{res}}(S)$  denote the (idealized) probability that all the barriers in  $S$  are resolved prior to discharge, and let  $\mathbb{P}_{\text{dc}}(S)$  denote the (idealized) probability that the patient is discharged within 24 hours *given* that the  $S$  barriers are resolved. We aim to solve the problem of finding  $S$  that maximizes

$$\max_{\text{barriers } S} \mathbb{P}_{\text{res}}(S) \cdot \mathbb{P}_{\text{dc}}(S),$$

the product of the probability of the barriers being resolved and the probability of discharge given that resolution. An optimal barrier set  $S^*$  to this problem balances the likelihood of those barriers

being resolved with the contribution that such barrier resolution makes to a patient’s discharge likelihood. The advantage of such an objective is that it implicitly accounts for the fact that some barriers are unlikely to be resolved even if they contribute significantly to discharge likelihood, while other barriers might be likely to be resolved but make little or no difference to a patient’s progression towards discharge. To solve this idealized problem, we need a way of estimating the two central quantities  $\mathbb{P}_{\text{res}}$  and  $\mathbb{P}_{\text{dc}}$ . The latter can be estimated using the discharge prediction model described in Section 2.1 and the former can be estimated using the barrier resolution prediction models described in Section 2.3.

We now translate this idealized problem of identifying a patient’s *minimal barriers* into an optimization problem where the decisions on the open barriers (“whether the barrier should be selected to resolve”) are reflected as changes in the current feature vector  $\mathbf{x}^c$  of a patient to a modified vector  $\mathbf{x}$  (in this section, we suppress the index for observation  $i$  to make the exposition simpler). Consequently, we try to decide which features to modify, by allowable changes, so that the product of the following two objective functions is maximized:

- $J_1(\mathbf{x}; \mathbf{x}^c)$ : the discharge likelihood within 24 hours if all selected barriers are resolved; this approximates the idealized  $\mathbb{P}_{\text{dc}}$ .
- $J_2(\mathbf{x}; \mathbf{x}^c)$ : the product (among the selected barriers  $S$  represented in changing  $\mathbf{x}^c$  to  $\mathbf{x}$ ) of each of the likelihoods that the given barrier will be resolved before discharge; this approximates  $\mathbb{P}_{\text{res}}(S)$ , the probability of the barriers in  $S$  being resolved, assuming all barriers resolve independently of one another.

The functions  $J_1$  and  $J_2$  are computed using the predictive models described in Sections 2.1 and 2.3, respectively, where  $\mathbf{x}$  and  $\mathbf{x}^c$  are the modified feature vector and the original feature vector of the patient, respectively.

Using these two objectives, we define the composite objective function  $J$  as the product  $J = J_1 \cdot J_2$  and we call this the **overall likelihood given a subset of barriers**. This is directly analogous to the idealized objective we discussed at the beginning of Section 2.4, with  $J_1$  estimating  $\mathbb{P}_{\text{dc}}$  and  $J_2$  estimating  $\mathbb{P}_{\text{res}}$ . Instead of optimizing  $J$  directly, we adopt a constraint-based multiobjective optimization perspective. In particular, we compute the Pareto frontier for  $J_1$  and  $J_2$  by solving instances of maximizing  $J_2$  subject to (iteratively updated) lower bounds on  $J_1$ . We proceed by describing the structure of the two different function  $J_1$  and  $J_2$ .

**Structure of  $J_2$ :** Notice that the second objective function  $J_2$  can be calculated by multiplying the personalized resolution likelihoods  $\mathbf{L}$  of the selected barriers readily available from the barrier resolution prediction models described in Section 2.3. To linearize  $J_2$ , we take the natural logarithm of the personalized likelihoods  $\log(L_j)$  so that maximizing the sum of log-likelihoods of the selected



barriers would be equivalent to maximizing the likelihood that all selected barriers will be resolved, which we refer to as their *collective resolution likelihood*. Addition of a new barrier to the list of selected barriers always reduces the collective resolution likelihood. Therefore, this objective function implicitly favors reducing the number of selected barriers.

The advantage over simply minimizing the number of selected barriers is that this way we are able to account for the differences in the resolution likelihoods of barriers. It is intuitive to conclude that one would prefer selecting a list of two barriers both very likely to be resolved by the time of discharge rather than a single barrier which will almost surely not be resolved. In this way,  $J_2$  can be generally thought of as a measure of **cost** (higher  $J_2$  corresponding to lower cost), and in other settings we expect that  $J_2$  might be more directly defined using actual costs.

**Structure of  $J_1$ :** On the other hand, optimizing with the first objective function,  $J_1$ , is a more challenging task for two reasons: it is implicitly expressed through a trained neural network; and the underlying decision space is discrete (i.e., binary decisions for whether each barrier is resolved) and enumeration is not practically feasible. To address this, we make use of the work of Anderson et al. (2020a) who proposed and evaluated tractable mixed integer program formulations to find the minimal subsets of features that leads to a desired change in neural network predictions. To apply their framework, we address two specific modifications:

- Not all features are modifiable; only the resolution features of open barriers can be changed from 0 to 1. In other words, the only allowed action is to “resolve an existing barrier.”
- The objective is not to minimize the number of selected barriers that can raise prediction score to a predefined level, but instead to maximize the function  $\log(J_2)$  subject to the prediction score being at least some threshold  $z_0$ .

In the Supplemental Material, we include a detailed exposition showing how these modifications can be made to yield a linear MIP formulation of the subproblem

$$[\text{SP}(z_0; \mathbf{x}^c)] \quad \begin{array}{ll} \max_{\text{feasible } \mathbf{x}} & \log J_2(\mathbf{x}; \mathbf{x}^c) \\ \text{s.t.} & J_1(\mathbf{x}; \mathbf{x}^c) \geq z_0, \end{array}$$

where  $z_0 \in [0, 1]$  is a fixed threshold and  $\mathbf{x}^c$  is a patient’s current feature vector. (The underlying decision variables are binary variables capturing whether each barrier is resolved.) Note that the key to this reformulation is using the underlying neural network structure of the model for predicting discharges. The resulting formulation has  $2h + p_b$  variables and  $4h + 2p_b + 1$  constraints, where  $h$  is the dimension of the hidden layer in the neural network (in our case, 100) and  $p_b$  is the number of barriers (in our case, 96).

**2.4.1. An Iterative Algorithm to Optimize  $J$ :** Given the formulation of SP as a MIP which is amenable to commercial solvers, we are now ready to proceed with an algorithm for maximizing  $J$  for a given observation  $\mathbf{x}^c$ . As noted earlier, we do so by solving  $\text{SP}(z_0; \mathbf{x}^c)$  across a spectrum of thresholds  $z_0 \in [0, 1]$ . The corresponding algorithm is shown in pseudocode in Algorithm 1, which we refer to as the *Barriers-to-Discharge* (or BtD) algorithm. The optimal solution  $\mathbf{x}^*$  to a given feature vector  $\mathbf{x}^c$  identifies a set of **prescribed (or minimal) barriers**, namely, the MIN set. The algorithm follows the usual approach used when computing Pareto frontiers, namely, instead of solving  $\text{SP}(z_0; \mathbf{x}^c)$  for all choices of  $z_0 \in \{0, \epsilon, 2\epsilon, \dots, 1\}$ , we only solve it for a (typically smaller) set of values.

In the remainder of the paper, we make use of two important definitions:

**Definition 1 (Feasible patient)** *Given a patient observation with corresponding feature vector  $\mathbf{x}^c$ , we say that the observation is **feasible** if there exists some set of open barriers such that  $J$  is strictly improved (up to tolerance  $\epsilon$ ) relative to the value of  $J$  when no open barriers are resolved; an infeasible patient has no prescribed barriers. In mathematical notation, this is equivalent to there existing some feasible feature vector  $\mathbf{x}$  such that  $J(\mathbf{x}; \mathbf{x}^c) > J(\mathbf{x}^c; \mathbf{x}^c) = J_1(\mathbf{x}^c)$ .*

**Definition 2 (Actionable patient)** *Given a feasible patient with feature vector  $\mathbf{x}^c$ , we say that the patient is **actionable with likelihood  $J^*$** , where  $J^* := J(\mathbf{x}^*; \mathbf{x}^c)$  as computed via the BtD algorithm. For every  $J' < J^*$ , we say that the patient is **actionable above threshold  $J'$** .*

---

**Algorithm 1** BtD( $\mathbf{x}^c, \mathbf{l}, \epsilon$ )

---

```
Initialize:  $z_0 \leftarrow J_1(\mathbf{x}^c, \mathbf{x}^c)$ ;  $J_{\max} \leftarrow 1$ ;  $J_{\text{best}} \leftarrow 0$ ; and  $\mathbf{x}_{\text{best}} \leftarrow \mathbf{x}^c$ 
while  $J_{\text{best}} < J_{\max}$  do
  [feasible,  $J_1, J_2, \mathbf{x}^*$ ]  $\leftarrow$  SP( $z_0; \mathbf{x}^c$ )
  if not feasible then
    break
  else # SP is feasible
     $J \leftarrow J_1 \cdot J_2$  and  $J_{\max} \leftarrow J_2$ 
    if  $J > J_{\text{best}}$  then
       $J_{\text{best}} \leftarrow J$  and  $\mathbf{x}_{\text{best}} \leftarrow \mathbf{x}^*$ 
    end if
  end if
   $z_0 \leftarrow J_1 + \epsilon$ 
end while
return  $\mathbf{x}_{\text{best}}, J_{\text{best}}$ 
```

---

### 3. Empirical Results

In this section, we assess the performance of our proposed approach on real data from a large academic medical center. More specifically, we answer the following questions:

1. How does the composite objective function  $J$  perform in discriminating likelihood of discharge given a selected subset of barriers?
2. Does the BtD algorithm primarily identify MAYBE patients as those who are actionable above certain thresholds as initially hypothesized? How does a patient's actionability relate to their initial discharge score, and how many barriers are typically prescribed?
3. What lower threshold  $J_{\min}$  should be chosen for actionable patients to yield a practically meaningful number of patients on a daily basis? Which barriers tend to be prescribed as minimal barriers, and how should these be interpreted in this context?
4. What is the contribution of personalized resolution likelihoods?
5. How does the BtD approach compare to complete enumeration in terms of computational efficiency? How can our approach be modified in settings with other (e.g., tree-based) predictive models?

We conducted our analysis on the out-of-sample test sample, i.e., 47,540 observations (patient-days) from 10,637 unique patients. We implemented the BtD algorithm in R and utilized Gurobi 8.1.1 as a mixed integer optimizer, with default parameters and a single thread, to solve the  $SP(z_0; \mathbf{x}^c)$  MIP instances within the BtD algorithm. All the experiments were carried out on a laptop with processor 3.1 GHz Dual-Core Intel Core i5, memory 8 GB 2133 MHz LPDDR3. In the Supplemental Material, we also include two additional use cases: identifying bed-days attributable to specific barriers and visualizing patient progression.

#### 3.1. Efficacy of the Composite Objective Function

We begin by assessing how well the composite objective function  $J$  performs in capturing the idealized definition of MIN. Such idealized barriers should satisfy two conditions simultaneously: (*I1*) that they all must be resolved by the time of discharge and (*I2*) the patient must be discharged within 24 hours after all of them are resolved. To test this, we performed the following analysis: for each test set observation, we randomly selected a subset of up to five of the patient's open barriers and calculated the objective function value  $J$  corresponding to the modified feature vector obtained by resolving the selected subset of barriers; then, retrospectively, we labeled each instance as follows:

$$\text{label} = \begin{cases} 1, & \text{if both conditions } I1 \text{ and } I2 \text{ were satisfied} \\ 0, & \text{otherwise.} \end{cases}$$

Overall, in this experiment 7.2% of observations (95% confidence interval [6.97%,7.44%]) had a label of 1. We checked whether higher values of  $J$  were correlated with the label 1 by plotting

the ROC curve of  $J$  versus the labels and calculating the AUC. Overall, the AUC was 0.783 (95% CI [0.775,0.791]); within the YES/MAYBE/NO subgroups, YES patients had an AUC of 0.905 ([0.891,0.913]), MAYBE patients 0.887 ([0.877,0.896]), and NO patients 0.766 ([0.756,0.776]). This suggests that  $J$  is particularly effective at discriminating between patients' labels within the YES and MAYBE subsets of patients, which is critical given that the MAYBE group was highlighted earlier as the central group of patients for whom identifying barriers is of special interest. In the Supplemental Material, we include detailed analysis on the performance of  $J$  with respect to conditions  $I1$  and  $I2$  and as a function of the number of selected barriers.

### 3.2. Identifying actionable patients

To better evaluate the BtD algorithm and assess our hypothesis that MAYBE patients account for the majority of actionable patients, we solved the BtD algorithm for all 47,540 observations. The corresponding results regarding the percent of patients who are actionable at different likelihood thresholds  $J_{\min} \in \{0, 0.25, 0.5, 0.75\}$  are shown in Figure 2 (2(a) shows percent actionable for a given initial discharge score, while 2(b) shows the empirical cumulative density functions for actionable patients above thresholds).

**Feasibility:** The percent of patients at a given discharge score who are feasible is shown with  $J_{\min} = 0$  in Figure 2(a). We observe that the percent of feasible patients generally decreases linearly with increasing baseline discharge scores. As a given observation being feasible coincides with the existence of at least one MIN (per the BtD algorithm), this behavior is consistent for our expectations of how MIN would behave: for patients who are in their current state unlikely to be discharged, there likely exist some barriers to their discharge which could raise their discharge likelihood (while also being reasonably likely to be resolved, given that the patient is further from discharge); at the same time, patients with increasingly higher scores are more likely to be discharged in their current state, so it is less likely that there exists barriers which not only increase the patient's discharge likelihood, but importantly are also likely to be resolved. This is particularly important given the patient heterogeneity noted earlier—not every barrier is always resolved by discharge (and indeed, some barriers are resolved only in a minority of patients), and some barriers only occur in specific patient subpopulations (which is particularly salient given that the data includes surgical patients across all services).

**Actionability at different thresholds:** Not surprisingly, increasingly larger minimum thresholds  $J_{\min}$  affect the percent of patients who are actionable. We also observe that the percent actionable above threshold  $J_{\min}$  peaks at approximately an initial discharge score of  $J_{\min}$  across the different choices shown. Overall, the qualitative behavior seen here suggests that the optimization approach we have taken to identifying actionable barriers aligns with the clinical intuition we

**Figure 2** Percent of actionable patients at a given score and with given value of  $J_{\min}$ , where  $J_{\min} \in \{0, 0.25, 0.50, 0.75\}$ . Two vertical lines for Maybe patient score cutoffs are shown; note that  $J_{\min} = 0$  corresponds to feasible patients.

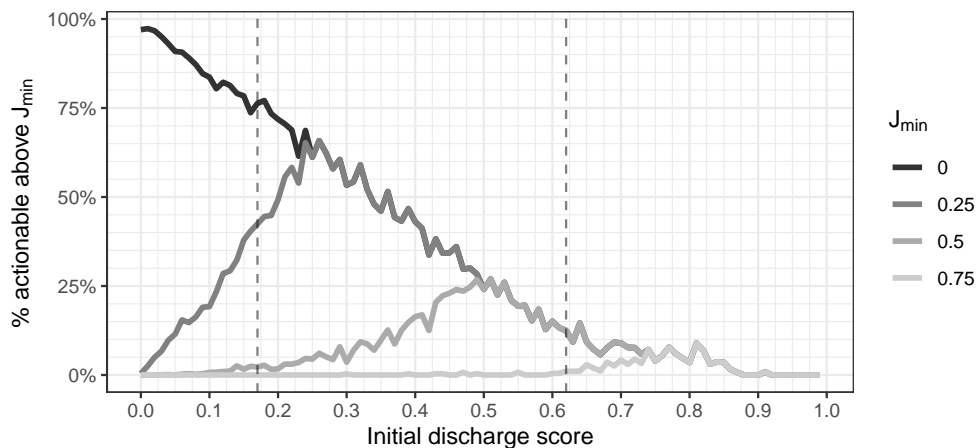

(a) Percent of actionable patients at a given initial discharge score (i.e.,  $J(\mathbf{x}^c; \mathbf{x}^c)$ ) and value of  $J_{\min}$  (initial scores grouped to second decimal)

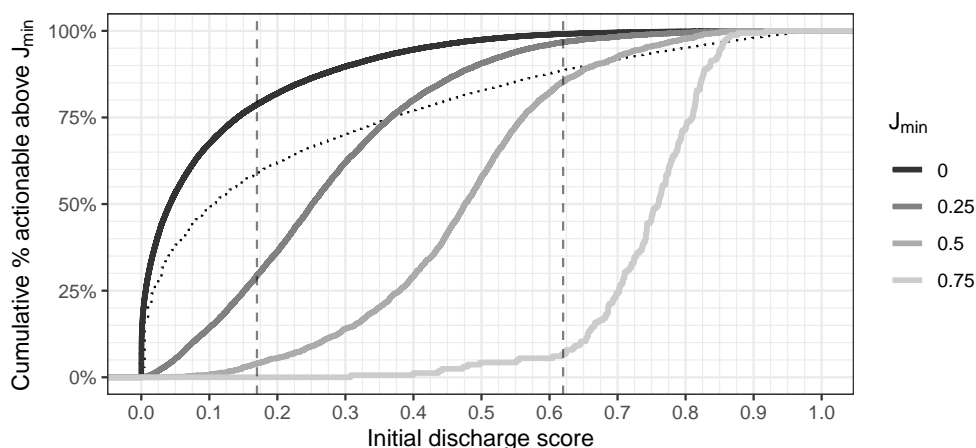

(b) Cumulative percent of actionable patients at a given discharge score and value of  $J_{\min}$ . The cumulative percent of *all* patients at a given score is shown as a dashed line for reference.

used to approach this problem, namely, that the composite objective would capture the trade-off between the likelihood of improving a patient’s discharge and the likelihood of being able to resolve barriers to put the patient in that improved discharge state.

We also note that the changing thresholds  $J_{\min}$  highlight the inherent tradeoff between the number of patients identified as actionable above such a threshold and how likely patients are to be discharged with such barriers resolved. We return to this point in more detail in Section 3.3.

**Proportion of Maybe patients:** Figure 2(b) confirms our initial hypothesis: while MAYBE patients account for 29.5% of observations in the test set (Table 1), they represent a disproportion-

ately large share of actionable patients across a range of thresholds. For example, at a threshold of  $J_{\min} = 0.25$ , MAYBE patients account for 67.3% of actionable patients, while at a threshold of  $J_{\min} = 0.5$ , MAYBE patients account for 81.3% of actionable patients. Not surprisingly, though, we do see that for  $J_{\min}$  sufficiently large (in our case,  $J_{\min} > 0.64$ ), MAYBE patients are no longer the majority of those identified as actionable (the same is true of  $J_{\min}$  sufficiently small, in our case  $J_{\min} < 0.17$ ).

**Number of prescribed barriers:** Among all feasible patients, the number of open barriers is 10.8 on average (median of 10, range of 1-38), while the number prescribed for such patients is 3.1 on average (median of 2, range 1-21). This suggests that the BtD algorithm is effective at reducing the list of barriers for each patient to a more reasonable number (28.6% of the list of open barriers on average, 25.0% on median, range of 3.7% to 100%). Consistent with this behavior, the number of prescribed barriers differs noticeably across the patient groups: NO patients are prescribed an average of 3.6 barriers (median 3, range [1,21]), MAYBE patients 1.2 barriers (1, [1,4]), and YES patients 1.0 barriers (1, [1,2]).

Finally, as the number of open barriers is negatively correlated with initial discharge score (correlation coefficient of  $-0.386$  for feasible patients), we expected that the number of prescribed barriers would also be negatively correlated with initial discharge score; indeed, we found this to be the case (correlation coefficient of  $-0.477$ ).

### 3.3. Model performance—Thresholds for actionability and Barriers selected

Given an overall understanding of how actionability relates to a patient’s underlying discharge likelihood, we now focus on addressing some specific questions:

- What choice of  $J_{\min}$  gives a reasonable number of actionable patients which is practically feasible to review on a daily basis?
- Which barriers are typically prescribed? What is a clinical interpretation of these barriers?
- As observed earlier, MAYBE and YES patients are often prescribed a single barrier. How often is this barrier the one with the highest personalized resolution likelihood?

**Model performance across choices of  $J_{\min}$ :** To assess the model performance, we consider several key metrics:

- (M1) the percentage of actionable observations for whom selected barriers were all resolved by the time of discharge;
- (M2) the percentage of observations meeting criterion (M1) who were discharged within 24 hours after all selected barriers were resolved; and
- (M3) the percentage of observations for which both (M1) and (M2) were satisfied.

We evaluated these across various thresholds  $J_{\min}$ ; the corresponding results are shown in Table 3. We also include several additional variables, such as values of the composite objective function and the percent of actionable patients relative to all patients.

**Table 3 Prescriptive model’s test-set performance at different choices of  $J_{\min}$ . The percent shown next to the number actionable is relative to all test-set observations. Averages for  $J^*$ ,  $J_1^*$ ,  $J_2^*$ , and “# Barriers” are based on those values as computed using the BtD algorithm. Recall that  $J_1^*$  corresponds to a discharge likelihood and  $J_2^*$  to a barrier resolution likelihood.**

| $J_{\min}$ | # Actionable<br>above $J_{\min}$ | # Barriers |            | Average value |         |       | Metric (%) |      |      |
|------------|----------------------------------|------------|------------|---------------|---------|-------|------------|------|------|
|            |                                  | Open       | Prescribed | $J_1^*$       | $J_2^*$ | $J^*$ | M1         | M2   | M3   |
| 0.0        | 33024 (69.5%)                    | 10.81      | 3.07       | 0.25          | 0.62    | 0.18  | 64.2       | 59.5 | 38.2 |
| 0.1        | 18562 (39.0%)                    | 8.73       | 1.85       | 0.38          | 0.74    | 0.28  | 71.8       | 65.6 | 47.1 |
| 0.2        | 11364 (23.9%)                    | 8.20       | 1.57       | 0.47          | 0.79    | 0.37  | 75.2       | 71.0 | 53.4 |
| 0.3        | 6909 (14.5%)                     | 7.84       | 1.38       | 0.55          | 0.82    | 0.45  | 77.6       | 75.8 | 58.8 |
| 0.4        | 3962 (8.3%)                      | 7.51       | 1.25       | 0.62          | 0.85    | 0.53  | 78.6       | 79.6 | 62.5 |
| 0.5        | 1983 (4.2%)                      | 7.22       | 1.16       | 0.69          | 0.88    | 0.61  | 80.0       | 84.6 | 67.6 |
| 0.6        | 877 (1.8%)                       | 7.06       | 1.10       | 0.76          | 0.90    | 0.69  | 79.5       | 86.8 | 69.0 |
| 0.7        | 315 (0.7%)                       | 7.14       | 1.06       | 0.83          | 0.92    | 0.77  | 81.6       | 87.9 | 71.7 |
| 0.8        | 79 (0.2%)                        | 8.10       | 1.08       | 0.89          | 0.94    | 0.84  | 89.9       | 87.3 | 78.5 |

As expected, we see that the percent of actionable patients who have all prescribed barriers resolved **and** are discharged within 24 hours of their resolution (i.e., metric  $M3$ ) increases as the threshold for actionability  $J_{\min}$  is increased, highlighting the tradeoff between the number of actionable patients identified and the percent of those patients for whom the prescribed barriers meet metric  $M3$ . In our setting, with an average daily surgical patient census of approximately 200 patients, we believe that a reasonably sized list of actionable patients would account for 3-5% of patients (approximately 5-10 patients); therefore,  $J_{\min} = 0.5$  would be a reasonable choice. One potential use case for such a list would be for targeted review on a daily basis by a multidisciplinary clinical team, identifying any process- and resource-related barriers that can be addressed and prioritized.

Overall, 69.5% of all patients are feasible. We believe that infeasible patients are likely those at an ambiguous stage in their care pathway, with some of the barriers they will encounter during their hospitalization not even been triggered yet (e.g., placing a request for a post-hospital facility). The reason we used the *trigger-resolution* framework to represent barriers was that introduction (trigger) of a barrier in itself will likely reduce the discharge prediction score, but it will also make possible a resolution whose contribution—if it occurs—to the prediction score will be higher than the score reduction caused by the triggering of the barrier. Indeed, if we compare feasible and infeasible patients, feasible patients tend to have more open barriers: overall an average of 10.81

barriers versus 6.79. This difference is partly attributable to feasible patients having lower baseline discharge scores, therefore we also looked at YES/MAYBE/NO patients separately as well:

- NO patients: feasible patients have 1.87 more barriers on average relative to infeasible patients (11.62 versus 9.75, 95% CI [1.63,2.11]).
- MAYBE patients: feasible patients have 1.18 more barriers on average (7.83 versus 6.65, 95% CI [1.08,1.27]).
- YES patients: feasible patients have 1.48 more barriers on average (7.20 versus 5.73, 95% CI [1.22,1.73]).

To conclude the quantitative discussion of the model performance, it is important to compare the values of the objective functions and their respective metrics. Per Table 3, we have the following:

1. The value  $J_2^*$  corresponds to a barrier resolution likelihood and is therefore intended as a proxy of metric  $M1$ . We see that on average,  $J_2^*$  consistently overestimates  $M1$  across all thresholds. The cause of this is likely multifactorial in nature. Firstly, note that  $J_2^*$  is defined as a product of individual likelihoods, while  $M1$  captures a **joint** resolution percent; however, barrier resolution is likely **not** independent across barriers, and therefore the product of individual estimates performs poorly. Interestingly, if we restrict our attention to actionable patients with a single prescribed barrier, the average value of  $J_2^*$  still overestimates  $M1$ . This suggests that, even though the resolution likelihood models were calibrated on a barrier-by-barrier basis, the optimization model has induced a form of selection bias such that the selected barrier has an overly optimistic resolution estimate.
2. The average score  $J_1^*$ , in contrast, consistently underestimates the 24-hour discharge percentage  $M2$ , and that discrepancy is to a larger degree than the one noted for  $M1$  (hence  $J^*$  is also underestimated). We suspect that this is likely due to the fact that, in progressing towards discharge, a patient's non-barrier features also change (for example, the feature of time-since-admission has a significant effect on discharge likelihood, but this is not a barrier). As developed, our BtD approach considers changes in discharge likelihood  $J_1$  based **only** on changes in barrier-related features. Given this shortcoming, one possible solution would be to consider other possible features changes in the formulation of  $SP(z_0; \mathbf{x}^c)$ . For example, one could build additional models to estimate how non-barrier features change with the resolution of barriers. Alternatively, one could take a robust optimization approach where there is a budget of allowable changes in non-barrier features. Another possibility is to modify the resolution likelihood models to be time-dependent, e.g., estimating likelihood of barrier resolution *within 24 (or 48) hours*. These approaches to ensure that  $J_1$  provides a higher fidelity estimate of discharge likelihood given feature resolution merit consideration in future work.



**Barrier prescription behavior:** To facilitate a qualitative understanding of the BtD algorithm, we also considered which barriers were prescribed by the model, especially in relation to the prevalence of that barrier and the average resolution likelihood of that barrier. The results of this analysis are shown in Figure 3 for the subset of patients who are actionable at  $J_{\min} = 0.5$  (the barriers in Table 2 are labeled for context).

**Figure 3** Average barrier resolution likelihood and prescription percentage among patients who are actionable above  $J_{\min} = 0.5$ . Each point is a barrier and its size corresponds to the percent of patients with that barrier triggered. All percents are relative to feasible Maybe patients only (with resolution/prescription percents relative to the subset of those with such a barrier). Two barriers are not shown (“On heparin” and “Consult–Addiction Services”) as these are never open barriers in this population. Abbreviations: PO=“medication taken by mouth”; IV=“intravenous”; PT=“physical therapy”; O2=“oxygen.”

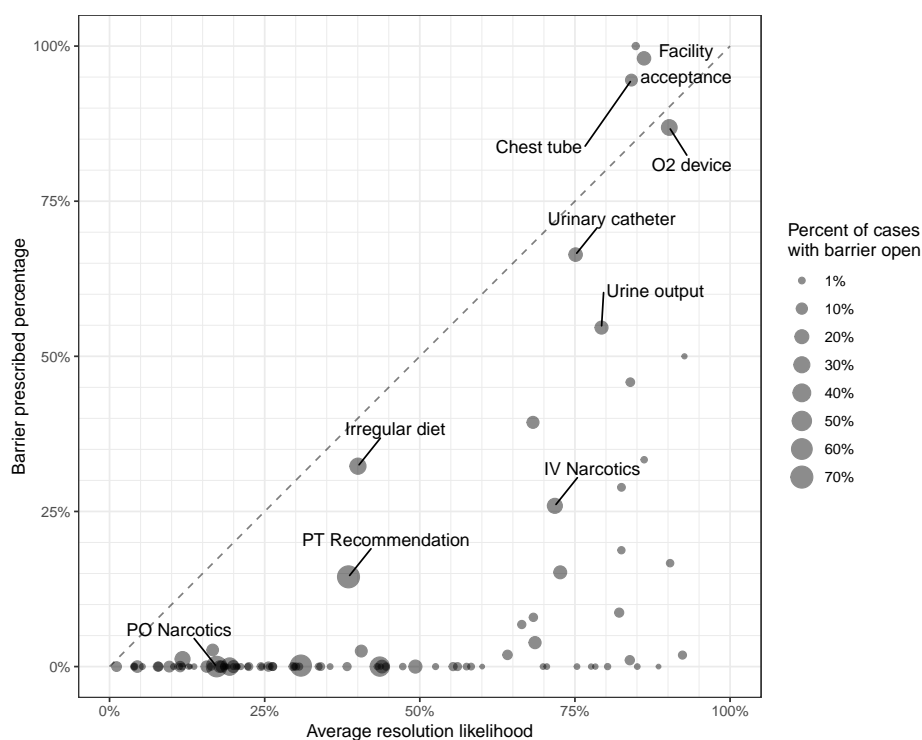

First of all, we note that barriers with low average resolution likelihood (below approximately 35%) are rarely prescribed as MIN. (An example of such a barrier is “PO Narcotics”, denoting that the patient is taking oral narcotic medication.) Further, with the exception of three barriers, the model almost exclusively prescribes a lower percent of that barrier than the average resolution likelihood.

This figure also highlights the relationship between some of the barriers, and it also points to the observational nature of the data. For example, let us consider two barriers related to post-discharge

accommodations: “Facility acceptance” (indicating that the patient is awaiting acceptance in a post-hospital facility, such as a skilled nursing facility, to which they will be transferred upon discharge) and “PT Recommendation” (indicating that the patient is still awaiting the physical therapy team to provide a recommendation on the appropriate post-discharge location for the patient). Facility Acceptance is the second most highly prescribed barrier among all 96 (on an absolute basis, prescribed to 17.5% of *all* actionable patients above  $J_{\min} = 0.5$ ), highlighting the critical importance of post-discharge facilities for a nontrivial number of patients (for those with the barrier, it is prescribed 98.0% of the time).

In contrast, the PT Recommendation barrier is prescribed 14.5% of the time it is open for a patient. We believe this discrepancy is likely due to the fact that the PT Recommendation barrier is not being reliably documented as resolved by discharge (as, in reality, the patient likely did receive such a team’s input before discharge), hence lower resolution likelihoods are estimated and, as a result, it is less likely to be prescribed. Overall, this highlights the inherent challenge with using EHR data, where documentation patterns and behavior evolve over time. Lastly, we believe that Figure 3 could also serve as the basis for further discussion with clinical teams on the ground to identify sources of the discrepancies between resolution versus prescription percentages.

Finally, we conclude this qualitative assessment by noting that we made the deliberate choice to include both clinical and non-clinical barriers in our model. Examples of clinical barriers include things like “O2 Device” (indicating a patient needs oxygen support), while “Facility Acceptance” or “Awaiting MRI [Magnetic Resonance Imaging]” would be non-clinical, resource-focused barriers. This choice was made early in the model development stages, and the primary impetus for that was because, even if specific interventions might be targeted at non-clinical barriers (for example, by facilitating additional MRI resources on a given day), the context of what clinical barriers remain for a patient is critically important. For example, if a patient is prescribed both a clinical and a non-clinical barrier, and their non-clinical barrier is resolved but the clinical barrier remains, the patient is still not necessarily likely to be discharged. Therefore, we believe the approach we have taken to identify (possibly multiple) barriers is critical to highlight for potential users how their interventions might help a patient progress toward discharge.

**Is the prescribed barrier the most likely to be resolved?** To conclude our discussion, we also checked whether the prescribed barriers were the ones with the highest resolution likelihood for that patient. Overall, 86% of actionable patients (above threshold 0.5) have a single prescribed barrier; among these patients, 88% are prescribed the barrier with the highest resolution likelihood (10% the second most likely, and 2% the third or lower barrier by likelihood). This suggests that it is necessary to consider both barrier resolution and its effect on discharge (as opposed to resolution

alone) in any heuristic approach to solving BtD. (We return to this in our computational discussion in Section 3.5). Lastly, we note that if we instead consider all feasible patients (i.e.,  $J_{\min} = 0$ ), then the percent with a single barrier is 36% (and among these, the prescribed barrier is the most likely 77% of the time).

### 3.4. Contribution of Personalization

To better understand the value of personalization (based on individual resolution likelihood models as developed in Section 2.3), we evaluated its performance relative to a simpler approach. Namely, we replaced the personalized likelihoods with the baseline resolution likelihood for each barrier (based on the percent resolved by discharge in the training sample); as such, for a given barrier, we gave every observation with that barrier open the same estimated resolution likelihood. Using these, we reran the BtD algorithm; to allow a fair comparison, we selected that value of  $J_{\min}^{\text{baseline}}$  so that the number of actionable patients at this threshold was the same as the choice of  $J_{\min}^{\text{personal}} = 0.5$  in the original, personalized approach, i.e., 1983 patient observations. (The selected value was  $J_{\min}^{\text{baseline}} = 0.4252$ .)

**Table 4 Comparison (%) of the performance of BtD using personalized versus baseline likelihoods.**

| Metric                                                                                                  | Personalized | Baseline | $p$ value |
|---------------------------------------------------------------------------------------------------------|--------------|----------|-----------|
| (M1): All prescribed barriers resolved                                                                  | 80.0%        | 73.3%    | < 0.001   |
| (M2): Discharged within 24 hours after prescribed barrier resolution, among those with criterion M1 met | 84.6%        | 83.0%    | 0.257     |
| (M3): Both M1 and M2 met                                                                                | 67.6%        | 60.8%    | < 0.001   |

In Table 4, we compare the two models with respect to the retrospective performance metrics used earlier. We observe that personalized BtD significantly outperforms the baseline in terms of the metrics  $M1$  and  $M3$ , meaning a higher patients have their prescribed barriers resolved, and a higher percent have both their barriers resolved and discharge shortly following that occurrence (statistical comparison are shown per a Fisher exact test, where we treat the two sets as independent samples). Importantly, we also see there is no appreciable difference in the likelihood of patients to be discharged within 24 hours *given that the prescribed barriers are resolved*, suggesting that the incremental improvement we see in the percent of patients meeting  $M3$  (the most important criterion in this setting) is specifically attributable to the personalization of resolution likelihood (whereas  $M2$  reflects the discharge likelihood model’s performance, which one would expect to be similar).

One of the reasons we believe that personalization is important in this context is the underlying patient heterogeneity noted earlier. What is a barrier that must be resolved in certain groups might not have a similar behavior in other groups, and therefore using additional covariate information is necessary to distinguish such variation in behavior observed in clinical practice.

### 3.5. Computational Efficiency

We conclude our assessment of the performance of the BtD algorithm by considering its computational efficiency. An alternative approach would be to enumerate all possible combinations of allowable changes in the feature vector, and choosing the combination that results in the best  $J$  value. Table 5 shows the results of a comparison of the two approaches in terms of average computational time per observation. As expected, we observe that the computational time required to run complete enumeration increases exponentially (approximately doubles) as the number of open barriers is increased by one, whereas the computational time required for BtD algorithm overall does not display any scaling behavior in the number of open barriers. This illustrates the scalability of the BtD algorithm for larger numbers of open barriers.

**Table 5** Computational performance of BtD algorithm compared to complete enumeration for all test set observations in terms of number of open barriers. Computation time is an average (in seconds) for complete enumeration and the BtD algorithm.

| # Open Barriers | # Observations |       | Average time |     |
|-----------------|----------------|-------|--------------|-----|
|                 | All            | MAYBE | Enumeration  | BtD |
| $\leq 9$        | 28022          | 11187 | < 1          | 2.5 |
| 10              | 3569           | 1030  | 1.3          | 3.3 |
| 11              | 2956           | 732   | 2.6          | 3.4 |
| 12              | 2381           | 428   | 5.4          | 3.5 |
| 13              | 1998           | 258   | 11.4         | 3.4 |
| 14              | 1564           | 163   | 24.7         | 6.7 |
| 15              | 1334           | 94    | 56.9         | 3.8 |
| 16              | 1013           | 45    | 144.9        | 3.0 |
| 17              | 865            | 30    | 404.7        | 2.8 |
| $\geq 18$       | 3838           | 57    | > 1800       | 3.4 |

**Resource-constrained settings:** In applied settings where maintaining a commercial mixed-integer optimization solver license is cost-prohibitive, we suspect that it would be possible to improve the enumeration approach in several ways. For example, one could prune part of the search tree based on the barrier resolution likelihoods (especially if one has a threshold  $J_{\min}$  already chosen based on an offline analysis). Alternatively, it is possible that one might restrict attention to only a **fixed** small number of possible barriers which, per the discussion in Section 3.2, in our setting could reasonably be around three or four. Finally, we expect that heuristics based on estimating the value of modifying a single barrier (in calculating  $J_1$  for all possible single-barrier resolutions) would also work reasonably well, with the main caveat being that predictive models which capture feature interactions are likely not as well approximated with such an approach. In the Supplemental Material, we include a detailed assessment of how feasible enumeration is given pre-specified choices of  $J_{\min}$ .

**Applicability to other model classes:** We end our discussion of the computational results by discussing two important points regarding the results observed in our setting. Firstly, many of the barriers in our setting have a baseline resolution likelihood well below 100%. This suggests that, by the nature of the composite objective  $J$  and the choice of some  $J_{\min} > 0$  to define actionability, the number of barriers chosen for actionable patients above this threshold will necessarily have a small number of barriers selected. Therefore, we believe that in settings where the barrier resolutions (in aggregate or on an individual-observation level) are higher overall, we expect the number of barriers prescribed per the BtD approach will also be higher, in which case the use of MIO modeling machinery is likely necessary. In our hospital-based application, we expect this to be the case as data quality improves (with technological refinements over time), implying that barrier resolution is more accurately recorded in patient records. (As noted in Section 3.3, this is likely contributing to low resolution likelihoods for certain barriers.)

Finally, and most importantly, our approach can also be applied in settings where the underlying predictive model  $J_1$  is not a feed-forward neural network. In particular, our approach requires being able to (in a practically acceptable amount of computational time) solve the problem of maximizing  $J_1$ . Similar MIO-formulation machinery as developed by Fischetti and Jo (2018) and Anderson et al. (2020a) has also been used in the settings where  $J_1$  is from different model classes. Examples of this include the following:

- Tree-based-models (classification trees, random forest, boosted trees): see Mišić (2020) and Biggs et al. (2022).
- Logistic regression: as logistic regression is a feed-forward neural network without any hidden layers, this can be seen as a special case of our approach.
- Black-box models: there has been a variety of work in recent years on approximating black-box models, especially in the area of explainable artificial intelligence (Guidotti et al. 2018). As part of this, a variety of techniques have been developed to estimate simpler models (either tree-based or neural-network-based) given a black-box model. Any such approximations could then be used directly as inputs to our approach with  $J_1$  (in this case, the black box) replaced by its proxy  $\tilde{J}_1$ .

Note that more sophisticated model classes for  $J_2$  (than the regularized logistic regression used here) can be easily incorporated into our approach with no increase in complexity (as these likelihoods are inputs to the BtD algorithm). At the same time, it is possible to accommodate other choices of composite  $J$  instead of the product, such as a convex combination of  $J_1$  and  $J_2$ .

## 4. Conclusion

In this study, we described an operational problem that is encountered at hospitals on a daily basis and which has a significant impact on inpatient capacity management. We highlighted that this

problem is not merely a prediction problem, but rather a prescription problem since the outcome (a patient’s discharge) is dependent on the interventions that may or may not occur, and therefore requires a data-driven approach.

By adopting the notion of a barrier, defined as an aspect of the patient’s current status that can potentially impact the patient’s discharge, we defined the problem as one of identifying a subset of barriers whose resolution are both necessary and sufficient for discharge. More formally, we formulated the problem of identifying minimal barriers as a prescriptive problem where the objective is to maximize the product of (i) the likelihood that the patient is discharged within 24 hours given that the selected barriers are resolved, and (ii) the likelihood that all the selected barriers are indeed resolved. To predict the discharge likelihood and the likelihood of a barrier’s resolution before discharge, which are required to calculate the aforementioned objective function, we trained machine learning models. We showed that the resulting prescriptive problem can be modeled as a mixed integer non-linear program which we then solved using an iterative algorithm.

Our computational experiments on real data corroborate (i) the utility of the proposed objective function in capturing the MIN, (ii) the effectiveness of the BtD algorithm in identifying the MIN, (iii) the significant impact of using personalized resolution likelihoods instead of baseline resolution likelihoods on the performance of the BtD algorithm, and finally (iv) the practical computational efficiency of the proposed BtD algorithm. In future work, we believe it would be important to consider the effect of such a model when implemented in practice as well modifications of our approach which consider additional constraints. For example, some barriers in our model correspond to those with a “global” capacity constraint (for example, the number of available post-discharge facility beds or slots in an MRI machine in a given day). Adding such between-patient constraints raises a variety of important methodological questions such as scalability of various decomposition approaches.

## References

- Anderson R, Huchette J, Ma W, Tjandraatmadja C, Vielma JP (2020a) Strong mixed-integer programming formulations for trained neural networks. *Mathematical Programming* 1–37.
- Anderson R, Huchette J, Ma W, Tjandraatmadja C, Vielma JP (2020b) Strong mixed-integer programming formulations for trained neural networks. *Mathematical Programming* 1–37.
- Azari A, Janeja VP, Mohseni A (2012) Predicting hospital length of stay (phlos): A multi-tiered data mining approach. *2012 IEEE 12th International Conference on Data Mining Workshops*, 17–24 (IEEE).
- Barnes S, Hamrock E, Toerper M, Siddiqui S, Levin S (2016) Real-time prediction of inpatient length of stay for discharge prioritization. *Journal of the American Medical Informatics Association* 23(e1):e2–e10.
- Bertsimas D, O’Hair A, Relyea S, Silberholz J (2016) An analytics approach to designing combination chemotherapy regimens for cancer. *Management Science* 62(5):1511–1531.

- Bertsimas D, Orfanoudaki A, Weiner RB (2020a) Personalized treatment for coronary artery disease patients: a machine learning approach. *Health Care Management Science* 23(4):482–506.
- Bertsimas D, Pauphilet J, Stevens J, Tandon M (2020b) Predicting inpatient flow at a major hospital using interpretable analytics. *medRxiv* .
- Bica I, Alaa AM, Jordon J, van der Schaar M (2020) Estimating counterfactual treatment outcomes over time through adversarially balanced representations. *arXiv preprint arXiv:2002.04083* .
- Biggs M, Hariss R, Perakis G (2022) Constrained optimization of objective functions determined from random forests. *Productions and Operations Management* .
- Chen L, Xu J, Lu Z (2018) Contextual combinatorial multi-armed bandits with volatile arms and submodular reward. *Advances in Neural Information Processing Systems* 31.
- Chen W, Wang Y, Yuan Y, Wang Q (2016) Combinatorial multi-armed bandit and its extension to probabilistically triggered arms. *The Journal of Machine Learning Research* 17(1):1746–1778.
- Conforti D, Guerriero F, Guido R, Cerinic MM, Conforti ML (2011) An optimal decision making model for supporting week hospital management. *Health Care Management Science* 14(1):74–88.
- Copenhaver MS, Hu M, Levi R, Safavi K, Zenteno Langle AC (2019) Health system innovation: Analytics in action. *Operations Research & Management Science in the Age of Analytics*, 238–266 (INFORMS).
- De Grood A, Blades K, Pendharkar SR (2016) A review of discharge-prediction processes in acute care hospitals. *Healthcare Policy* 12(2):105.
- Fischetti M, Jo J (2018) Deep neural networks and mixed integer linear optimization. *Constraints* 23(3):296–309.
- Friedman J, Hastie T, Tibshirani R (2010) Regularization paths for generalized linear models via coordinate descent. *Journal of Statistical Software* 33(1):1–22.
- Gartner D, Kolisch R (2014) Scheduling the hospital-wide flow of elective patients. *European Journal of Operational Research* 233(3):689–699.
- Guidotti R, Monreale A, Ruggieri S, Turini F, Giannotti F, Pedreschi D (2018) A survey of methods for explaining black box models. *ACM computing surveys (CSUR)* 51(5):1–42.
- Hastie T, Tibshirani R, Friedman JH (2009) *The elements of statistical learning: data mining, inference, and prediction* (Springer), 2nd edition.
- Huang Y, Li W, Macheret F, Gabriel RA, Ohno-Machado L (2020) A tutorial on calibration measurements and calibration models for clinical prediction models. *Journal of the American Medical Informatics Association* 27(4):621–633.
- Karhade AV, Ogink P, Thio Q, Broekman M, Cha T, Gormley WB, Hershman S, Peul WC, Bono CM, Schwab JH (2018) Development of machine learning algorithms for prediction of discharge disposition after elective inpatient surgery for lumbar degenerative disc disorders. *Neurosurgical Focus* 45(5):E6.

- Kim K, Lee C, O’Leary K, Rosenauer S, Mehrotra S (2014) Predicting patient volumes in hospital medicine: A comparative study of different time series forecasting methods. *Northwestern University, Illinois, USA, Scientific Report* .
- Levin SR, Harley ET, Fackler JC, Lehmann CU, Custer JW, France D, Zeger SL (2012) Real-time forecasting of pediatric intensive care unit length of stay using computerized provider orders. *Critical Care Medicine* 40(11):3058–3064.
- Liu V, Kipnis P, Gould MK, Escobar GJ (2010) Length of stay predictions: improvements through the use of automated laboratory and comorbidity variables. *Medical Care* 739–744.
- McCoy TH, Pellegrini AM, Perlis RH (2018) Assessment of time-series machine learning methods for forecasting hospital discharge volume. *JAMA Network Open* 1(7):e184087–e184087.
- Mišić VV (2020) Optimization of tree ensembles. *Operations Research* 68(5):1605–1624.
- Morton A, Marzban E, Giannoulis G, Patel A, Aparasu R, Kakadiaris IA (2014) A comparison of supervised machine learning techniques for predicting short-term in-hospital length of stay among diabetic patients. *2014 13th International Conference on Machine Learning and Applications*, 428–431 (IEEE).
- Rajkomar A, Oren E, Chen K, Dai AM, Hajaj N, Hardt M, Liu PJ, Liu X, Marcus J, Sun M, et al. (2018) Scalable and accurate deep learning with electronic health records. *npj Digital Medicine* 1(1):18.
- Ribeiro MT, Singh S, Guestrin C (2016) “Why should I trust you?”: Explaining the predictions of any classifier. *Proceedings of the 22nd ACM SIGKDD International Conference on Knowledge Discovery and Data Mining*, 1135–1144.
- Rubin DB (2005) Causal inference using potential outcomes: Design, modeling, decisions. *Journal of the American Statistical Association* 100(469):322–331.
- Safavi KC, Khaniyev T, Copenhaver M, Seelen M, Zenteno Langle AC, Zanger J, Daily B, Levi R, Dunn P (2019) Development and validation of a machine learning model to aid discharge processes for inpatient surgical care. *JAMA Network Open* 2(12):e1917221–e1917221.
- Shalit U, Johansson FD, Sontag D (2017) Estimating individual treatment effect: generalization bounds and algorithms. *International Conference on Machine Learning*, 3076–3085 (PMLR).
- Steyerberg EW (2019) *Clinical Prediction Models: A Practical Approach to Development, Validation, and Updating* (Springer), 2nd edition.
- Temple MW, Lehmann CU, Fabbri D (2015) Predicting discharge dates from the NICU using progress note data. *Pediatrics* 136(2):e395–e405.
- Van Walraven C, Forster AJ (2017) The TEND (Tomorrow’s Expected Number of Discharges) model accurately predicted the number of patients who were discharged from the hospital the next day. *Journal of Hospital Medicine* 13(3):158–163.



**Table SM1 Overview of the data sources used. “Categorical” indicates that only one of the values in a given list can be used for each patient, while several values can be used if the type is “Set.”**

| Source             | Description of data                                   | Examples                                  | Type        |
|--------------------|-------------------------------------------------------|-------------------------------------------|-------------|
| Demographics       | Patient’s age, sex, and marital status                | 60, Female, Married                       | Categorical |
|                    | Admission source for the current hospitalization      | Physician referral, Outside facility      | Categorical |
| Encounter Info     | Patient class for the current hospitalization         | Inpatient, Surgery admit                  | Categorical |
|                    | Surgery type(s) that the patient has had              | Total knee replacement, Spinal fusion     | Set         |
|                    | Inpatient floor the patient is currently on           | Ellison7, Lunder6                         | Categorical |
|                    | Surgical service currently taking care of the patient | Orthopedics, Neurosurgery                 | Categorical |
|                    | Primary treatment team                                | Team IDs                                  | Categorical |
|                    | Attending physician                                   | Employee IDs                              | Categorical |
| Flowsheets         | Measurements of vital signs                           | Temperature, Blood pressure               | Numeric     |
|                    | Bedside nurse assessments                             | Pain score, fluid intake/output           | Numeric     |
|                    | PT/OT/SLP assessments                                 | Assistive device, recommendation          | Set         |
|                    | CM assessments                                        | High risk assessment, Discharge barriers  | Set         |
| Labs               | Lab measurements for a list of components             | White blood cell, Hemoglobin              | Numeric     |
| LDAs               | Placement/removal of lines/drains/airways             | Urinary Catheter, Suction Drain           | Set         |
| Medications        | Dose and route of the administration of medications   | Narcotics, Antiemetics                    | Set         |
| Orders             | Placement and completion of physician consults        | Physiotherapy, Cardiology, Psychiatry     | Set         |
|                    | Types and the current status of Imaging studies       | MRI - Pending, XR - In progress           | Set         |
|                    | Dietary status of the patient                         | Regular, Sips of water, No oral intake    | Set         |
|                    | Placement and completion of blood work orders         | Red Blood Cell, Plasma                    | Set         |
| Facility referrals | Referral to and acceptance from outside facilities    | Name/type of facility, status of referral | Set         |

## Supplemental Material

This Supplemental Material contains the following additional tables, figures, and analysis for completeness:

1. features included in the data (see Table SM1);
2. information on performance of different classifier algorithms for discharge prediction (see Table SM2);
3. calibration curves for the discharge prediction score (see Figure SM1);
4. pairwise comparison of test set AUC, percent of observations with a given barrier, and percent resolved for that barrier;
5. details of the formulation of the problem of maximizing  $J_2$  subject to lower bounds on  $J_1$  as a MIP by using the approach of Anderson et al. (2020b);
6. the performance of  $J$  as a function of the number of selected barriers;
7. discussion of two additional use cases for actionable barriers in identifying an estimate of the number of bed-days attributable to a specific barrier and in visualizing patient progression;
8. further discussion of improvements to a full enumeration approach based on various choices of  $J_{\min}$ ; and
9. the full list of barriers after filtering (Table SM4).

**Table SM2** Performances of different classifier algorithms on the test sample

| Classifier               | AUC          | Recall       | Precision    |
|--------------------------|--------------|--------------|--------------|
| Classification Tree (CT) | 0.814        | 0.545        | 0.540        |
| Logistic Regression (LR) | 0.866        | 0.616        | 0.607        |
| Neural Network (NN)      | <b>0.882</b> | <b>0.622</b> | <b>0.629</b> |

## 5. Additional predictive modeling details

### 5.1. Out-of-sample prediction performance

For precision and recall calculations in Table SM2, we used the *unbiased* threshold score above which a patient is predicted to be discharged and below which is predicted not to be discharged. We defined the unbiased threshold as that which would equally balance model recall and precision in the training set. Moreover, when this threshold is used to convert prediction scores to binary classifications, the number of predicted discharges in a given subset is expected to be equal to the number of actual discharges in that subset, hence the name “unbiased threshold.”

**Figure SM1** Calibration curves for the discharge prediction scores on the three data sets. Predictions grouped into 20 equally sized groups for each of the data sets.

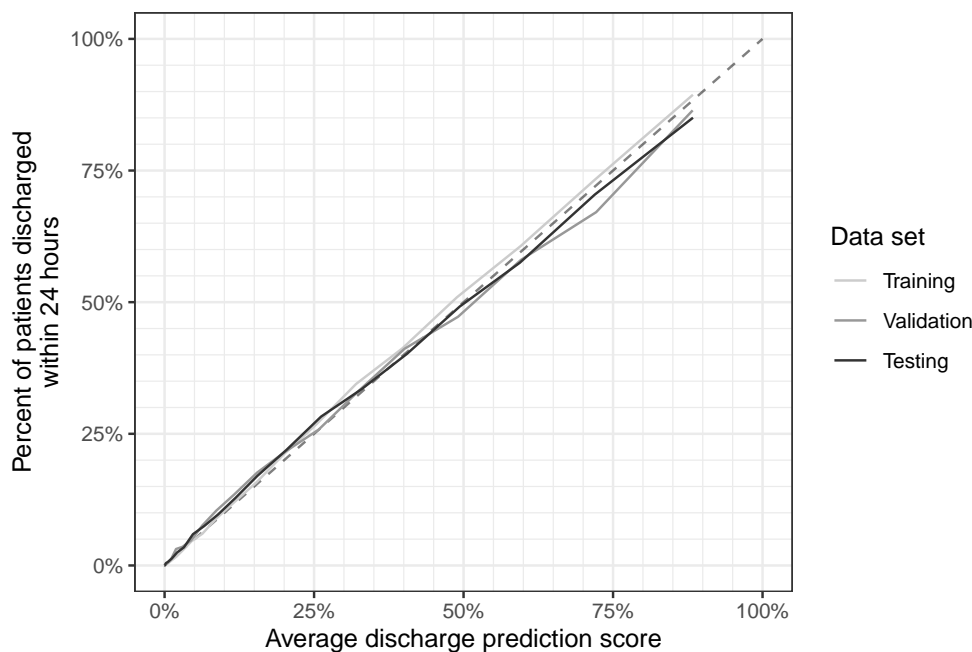

### 5.2. Resolution likelihood model performance

In Figure SM2, we show the performance of the resolution likelihood models on the test set. Here the performance measure shown is AUC, and we consider the relationship between AUC and the underlying percent of observations with each barrier as well as the percent of observations with the barrier resolved (among those with that barrier). Each point corresponds to a barrier. Note

**Figure SM2 Resolution likelihood models—Pairwise comparison of test set AUC, percent of observations with a given barrier, and percent resolved for that barrier. The diagonal shows histograms for each of those three measures; the upper diagonal displays correlation coefficients; and the lower diagonal shows scatter plots.**

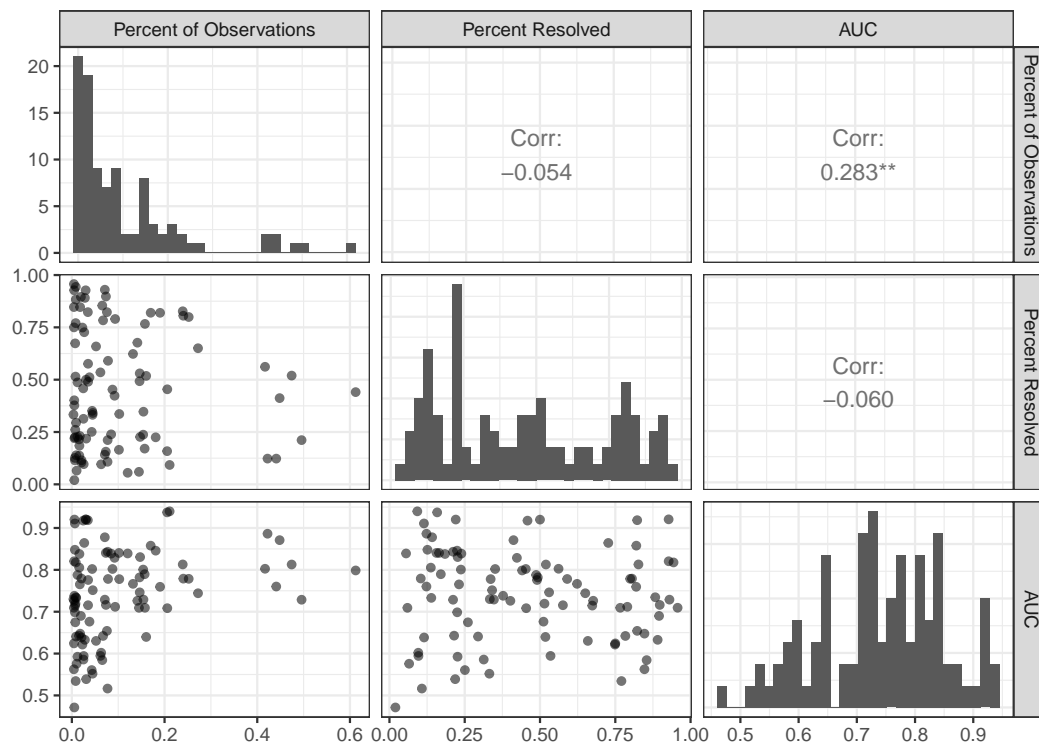

that one barrier has test AUC strictly below 0.5 (although all training and validation AUCs were strictly larger than 0.5, by design). In general, we see that there is a significant positive correlation between AUC and the percent of observations, as noted in the main text.

### 5.3. Performance of $J$ as function of number of selected barriers

In Section 4, we assessed the performance of  $J$  for a randomly selected subset of up to five barriers (choosing from one through five with equal probability) to reflect a variety of scenarios including a single barrier being selected up to five barriers. (If there were fewer than five barriers, we sampled at most the number of open barriers.) To better understand how the performance of  $J$  varies as a function of the number of barriers, we also consider when  $k$  open barriers selected, for  $k \in \{1, 2, \dots, 10\}$ . In particular, for each  $k$ , we consider the subset of test set observations with at least  $k$  open barriers; for each observation, we randomly select a subset of  $k$  of those barriers, and then compute the corresponding value of  $J_1$ ,  $J_2$ , and  $J$ , along with the label as defined in Section 4.

For each choice of  $k$ , we compare several metrics:

- Brier score (relative to the labeled outcome);
- AUC for  $J$  (relative to the labeled outcome);

- AUC for  $J_1$  (relative to the discharged-within-one-day outcome, only on the subset of patients with all selected barriers resolved); and
- AUC for  $J_2$  (relative to all-barriers-resolved outcome).

The corresponding results are shown in Figure SM3. Note that the Brier score for the labeled outcome (whether patient has all selected barriers resolved *and* is discharged within one day of all such barriers being resolved) decreases as the number of barriers increases. At the same time, the overall AUC for  $J$  generally increases, going from 0.727 for  $k = 1$  to 0.906 for  $k = 10$ . Interestingly, the AUC for  $J_1$  is generally decreasing, while the AUC for  $J_2$  is increasing. One possible explanation for the decrease in AUC for  $J_1$  is that with a larger number of selected barriers, more time is likely required to pass before barrier resolution (and hence the discharge model, which does not account for changes in non-barrier features, degrades in performance). Note that the increasing width of the  $J_1$  confidence intervals is because this is calculated on an increasingly small subset of observations.

**Figure SM3** Brier score and AUC metrics for composite objective as a function of the number of barriers selected (95% CI are shown for each metric). The Brier score shown is for  $J$  (not  $J_1$  nor  $J_2$ ).

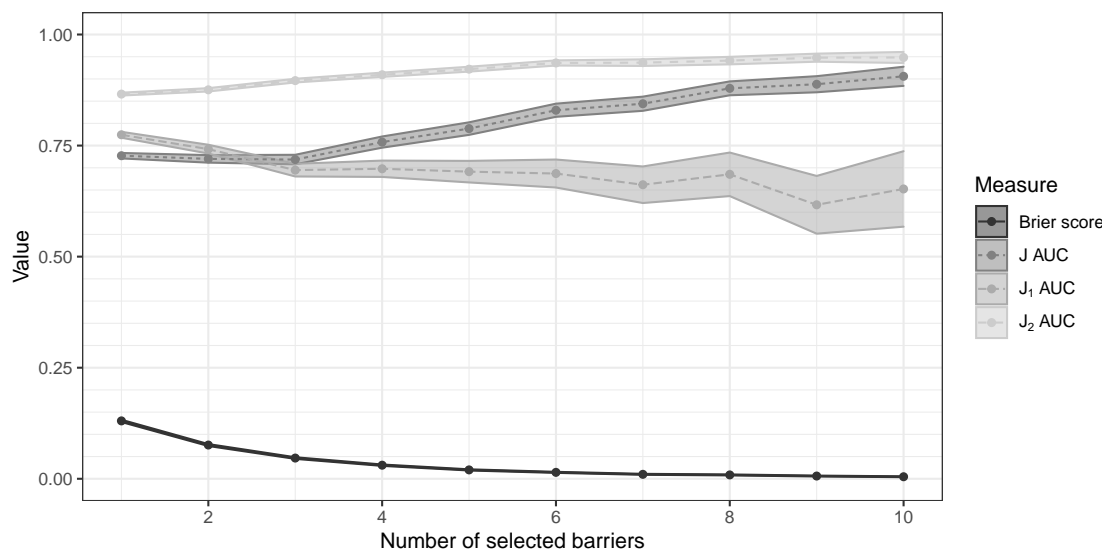

## 6. MIP formulation approach

Here we show the details of formulating the problem of maximizing  $J_2$  subject to a lower bound on  $J_1$  can be formulated as a linear mixed integer program (MIP), thereby making use of the formulation approach taken in Anderson et al. (2020b). For expository purposes, we begin by examining the structure of a single-hidden-layer neural network to illustrate how the prediction score is calculated (the discharge prediction model as used in the main text has this structure).

Figure SM4 shows an example of a (feed-forward) neural network with 5 input nodes, 3 hidden nodes and a single output node. In this mock example,  $\mathbf{x} = (x_1, x_2, x_3, x_4, x_5)$  is the input feature

vector. The values  $a_{j1}, a_{j2}, a_{j3}$  are the coefficients of the  $j^{th}$  feature in the first, second, and third hidden nodes, respectively. Moreover,  $a_{01}, a_{02}, a_{03}$  are the biases added to the the first, second, and third hidden nodes, respectively. The outputs of hidden nodes  $(y_1, y_2, y_3)$  are calculated as follows:  $y_k = f\left(a_{0k} + \sum_{j=1}^5 a_{jk}x_j\right) = \max\left\{0, a_{0k} + \sum_{j=1}^5 a_{jk}x_j\right\}$ . Similarly,  $b_1, b_2, b_3$  are the coefficients of the first, second, and third hidden nodes in the output node, and  $b_0$  is the bias added to the output node. The output prediction score  $z$  is calculated as follows:

$$z = g\left(b_0 + \sum_{k=1}^3 b_k y_k\right) = \left(1 + \exp\left(-b_0 + \sum_{k=1}^3 b_k y_k\right)\right)^{-1}.$$

**Figure SM4** Network structure and parameters for an example feedforward neural network classifier

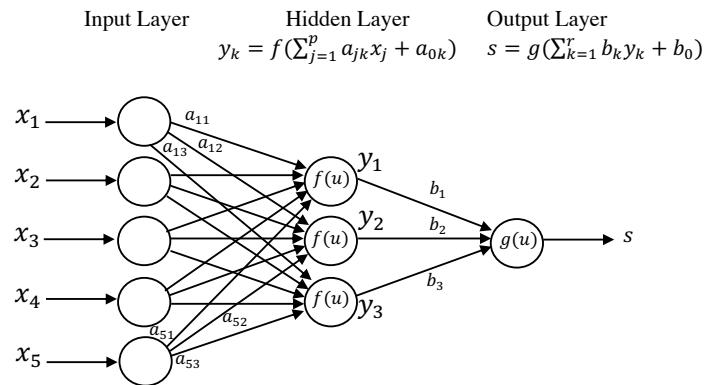

To formalize the structure illustrated in Figure SM4 and adapt it to our problem setting, we partition the feature space into 4 components as described in Section 2 in the main text:  $\mathbf{x} = (x_1, x_2, \dots, x_p) = (\mathbf{s}; \mathbf{d}; \mathbf{t}; \mathbf{r}) = (s_1, s_2, \dots, s_{p_s}; d; t_1, t_2, \dots, t_{p_t}; r_1, r_2, \dots, r_{p_r})$ . In other words, we define 4 sets of indices  $\mathcal{S} = \{1, 2, \dots, p_s\}$ ,  $\mathcal{D} = \{p_s + 1\}$ ,  $\mathcal{T} = \{p_s + 2, \dots, p_s + 1 + p_t\}$ , and  $\mathcal{R} = \{p_s + 1 + p_t + 1, \dots, p_s + 1 + 2p_t\}$  that represent the set of indices of the static, days since admission, trigger and resolution features, respectively, in our feature space. In Section 3.1 in the main text, the trained neural network model had  $p = p_s + 1 + 2p_t$  input nodes,  $r$  hidden nodes (on a single layer), and a single output node to predict the discharge likelihood within 24 hours for a given feature vector  $\mathbf{x}^c = (x_1^c, x_2^c, \dots, x_p^c)$  of size  $p$ . The following are parameters of the prediction model:

$a_{0k}, \forall k \in [r]$ : Bias added to the  $k^{th}$  hidden node

$a_{jk}, \forall j \in [p]$  and  $\forall k \in [r]$ : Coefficient of the  $j^{th}$  feature in the  $k^{th}$  hidden node

$b_0$ : Bias added to the output node

$b_k, \forall k \in [r]$ : Coefficient of the  $k^{th}$  hidden node in the output node

$f(u) = \max\{0, u\}$ : ReLU activation function for the hidden nodes

$g(u) = (1 + \exp(-u))^{-1}$ : Logistic activation function for the output node

Next, we introduce three sets of decision variables to express the problem as a MIP:

$x_j, \forall j \in \mathcal{R}$ : indicating the new value of the (resolution) feature  $j$

$y_k, \forall k \in [r]$ : indicating the output of the  $k^{th}$  hidden node

$u_k, \forall k \in [r]$ : indicating whether the  $k^{th}$  hidden node is active, i.e., has positive output

For a given feature vector and parameters, the output  $y_k$  of the  $k^{th}$  hidden layer can be written as follows:

$$y_k = \max\{0, a_{0k} + a_{1k}x_1^c + a_{2k}x_2^c + \dots + a_{pk}x_p^c\}, \forall k \in [r] \quad (1)$$

which can be expressed linearly with the following sets of constraints and auxiliary binary variables  $u_k$ .

$$y_k \geq a_{0k} + a_{1k}x_1^c + a_{2k}x_2^c + \dots + a_{pk}x_p^c, \forall k \in [r] \quad (2a)$$

$$y_k \leq a_{0k} + a_{1k}x_1^c + a_{2k}x_2^c + \dots + a_{pk}x_p^c + M(1 - u_k), \forall k \in [r] \quad (2b)$$

$$y_k \leq Mu_k, \forall k \in [r] \quad (2c)$$

$$y_k \geq 0, u_k \in \{0, 1\}, \forall k \in [r] \quad (2d)$$

(Here,  $M$  is an appropriately calibrated constant.) Similarly, the prediction score  $z$ , which is the output of the output layer, can be written as

$$z = \frac{1}{1 + \exp(-(b_0 + b_1y_1 + b_2y_2 + \dots + b_ry_r))}$$

Note that if we would like this modified score to be greater than a pre-determined threshold  $z_0$ , then this can be written as a linear constraint:

$$b_1y_1 + b_2y_2 + \dots + b_ry_r \geq \log\left(\frac{z_0}{1 - z_0}\right) - b_0.$$

Finally, we incorporate the restrictions on the allowed changes to the feature vector. Specifically,

- $x_j \in \{0, 1\}, \forall j \in \mathcal{R}$ : we are only allowed to change the barrier resolution features from 0 to 1
- $x_{\mathcal{R}(j)} \leq x_{\mathcal{T}(j)}^c, \forall j \in [p_b]$ : only a currently open barrier can be resolved,
- $x_{\mathcal{R}(j)} \geq x_{\mathcal{R}(j)}^c, \forall j \in [p_b]$ : a barrier that is already resolved cannot be reverted back to being unresolved

where  $\mathcal{R}(j)$  and  $\mathcal{T}(j)$  indicate the  $j^{th}$  element of the index set  $\mathcal{R}$  and  $\mathcal{T}$ , respectively.

Note that the current features  $\mathbf{x}^c$  are fixed parameters in our subproblem. Similarly, the personalized resolution log-likelihoods  $\log(L_j)$  are parameters pre-calculated from the barrier resolution prediction models for each barrier. Finally, the coefficients of the neural network model  $\mathbf{a} = (a_{jk})$ ,  $\mathbf{b} = (b_k)$  are also the fixed parameters in the subproblem. Given a threshold discharge prediction

score  $z_0$ , the following is the MIP formulation for the aforementioned subproblem, hereinafter referred to as  $\text{SP}(z_0; \mathbf{x}^c)$ :

$$[\text{SP}(z_0; \mathbf{x}^c)] \quad \max \sum_{j \in [p_b]} \log(L_j) x_{\mathcal{R}(j)} \quad (3a)$$

$$\text{s.t. } y_k - \sum_{j \in \mathcal{R}} a_{jk} x_j \geq \sum_{j \in \mathcal{S} \cup \mathcal{D} \cup \mathcal{T}} a_{jk} x_j^c + a_{0k} \quad \forall k \in [r] \quad (3b)$$

$$y_k - \sum_{j \in \mathcal{R}} a_{jk} x_j + M u_k \leq \sum_{j \in \mathcal{S} \cup \mathcal{D} \cup \mathcal{T}} a_{jk} x_j^c + a_{0k} + M \quad \forall k \in [r] \quad (3c)$$

$$y_k - M u_k \leq 0 \quad \forall k \in [r] \quad (3d)$$

$$\sum_{k=1}^r b_k y_k \geq \log\left(\frac{z_0}{1-z_0}\right) - b_0 \quad (3e)$$

$$x_{\mathcal{R}(j)} \leq x_{\mathcal{T}(j)}^c \quad \forall j \in [p_b] \quad (3f)$$

$$x_{\mathcal{R}(j)} \geq x_{\mathcal{R}(j)}^c \quad \forall j \in [p_b] \quad (3g)$$

$$y_k \geq 0 \quad \forall k \in [r] \quad (3h)$$

$$u_k \in \{0, 1\} \quad \forall k \in [r] \quad (3i)$$

$$x_j \in \{0, 1\} \quad \forall j \in \mathcal{R} \quad (3j)$$

In the above formulation, constraints (3b)-(3d) linearize the ReLU activation function, i.e.,  $y_k = \max\{0, a_{0k} + \sum_{j \in \mathcal{S} \cup \mathcal{D} \cup \mathcal{T}} a_{jk} x_j^c + \sum_{j \in \mathcal{R}} a_{jk} x_j\}$ . Constraint (3e) imposes the restriction that the modified score has to be above the pre-determined threshold  $z_0$ . Constraints (3f) impose the condition that a barrier cannot be resolved if it is not triggered in the first place and (3g) impose that a barrier cannot be reverted back to being “unresolved” if it is currently resolved. Finally (3h)-(3j) define the types and bounds of the decision variables.

Note that the formulation contains  $2r + p_b$  variables and  $4r + 2p_b + 1$  constraints. While the formulation explicitly includes variables  $x_j$  even for barriers  $j$  that are not triggered, a simple preprocessing step can eliminate these (as they will equal zero in any feasible solution).

## 7. Additional use cases

### 7.1. Attributable bed-days

Identifying, in a scalable and transparent manner, which barriers prevent patients from being discharged is a challenging problem in hospital operations, particularly given the number of barriers present and the need to attribute such delays to patient-specific needs. Here we consider how our approach provides estimates of bed-days directly attributable to a barrier, thereby highlighting the opportunity available by addressing specific barriers.

In particular, we consider the subset  $S$  (among all test observations) of those which meet the following criteria: a single barrier is prescribed, and the patient is not discharged within 24 hours.

**Table SM3 Attribution estimates (for the test set) across all barriers with estimate at least 20 bed-days. We restrict our attention to only observations where the patient is not discharged within 24 hours.**

| Barrier $b$                                            | # Observations where $b$ is the only prescribed barrier | $\widehat{\text{Attrib}}(b)$ |
|--------------------------------------------------------|---------------------------------------------------------|------------------------------|
| Awaits post-hospital facility acceptance               | 2508                                                    | 400.7                        |
| Irregular diet                                         | 1475                                                    | 239.5                        |
| Awaits Physical Therapy's post-hospital recommendation | 784                                                     | 95.1                         |
| Chest tube                                             | 314                                                     | 87.0                         |
| Urinary catheter                                       | 422                                                     | 73.8                         |
| Oxygen device need                                     | 583                                                     | 69.4                         |
| Gastrostomy tube                                       | 277                                                     | 49.6                         |
| Intravenous narcotics                                  | 483                                                     | 38.7                         |
| Antiemetic medications                                 | 317                                                     | 25.3                         |

Among this subset, we define an estimate of **delays attributable to barrier  $b$** , measured in bed-days, as

$$\widehat{\text{Attrib}}_S(b) := \sum_{\substack{(\mathbf{x}^c, \mathbf{x}^*) \in S, \\ b \text{ is resolved} \\ \text{barrier}}} (J_1(\mathbf{x}^*; \mathbf{x}^c) - J_1(\mathbf{x}^c; \mathbf{x}^c)),$$

where the observation  $(\mathbf{x}^c, \mathbf{x}^*) \in S$  corresponds to an observation with feature vector  $\mathbf{x}^c$  and  $\mathbf{x}^*$  is the corresponding optimal solution return by the BtD algorithm. The difference  $J_1(\mathbf{x}^*; \mathbf{x}^c) - J_1(\mathbf{x}^c; \mathbf{x}^c)$  accounts for the improvement in the patient's 24-hour discharge score given the resolution of the prescribed barrier.

The corresponding estimated attributions are shown in Table SM3 for all barriers with estimates above 20 bed-days in the test sample. Not surprisingly, the barrier of “awaiting post-hospital facility acceptance” (indicating there are active requests to place the patient into a post-hospital location such as rehab or a skilled nursing facility) accounts for the largest attributable number of bed-days (representing 0.8% of the total bed-days in the test set). We suspect that this is a significant underestimate, highlighting the underlying challenges in attributing delays in care to specific barriers. For that reason, we believe this area remains ripe for further analytical investigation and modeling.

## 7.2. Understanding patient progression

Here we highlight another way to use our modeling framework, in this case considering how a patient evolves in terms of their actionability and discharge likelihood throughout their hospitalization. More precisely, we consider two dimensions: a patient's YES/MAYBE/NO category; and the number of prescribed barriers (for simplicity, grouped into four categories,  $\{0, 1, 2, 3+\}$ , where 0 denotes the patient is not prescribed any barriers).



For every patient, we observe how the patient’s status changes from day to day. For example, a patient may be hospitalized with length-of-stay one day with the following sequence of states:

Day 0: No (2 prescribed) → Day 1: YES (1 prescribed) → Discharged.

Based on the frequencies observed in the test set, we have a corresponding transition matrix with estimated probabilities of transitioning from one state to the next, shown in Figure SM5 with each row corresponding to a patient’s state on day  $d$  and the columns their state on day  $d + 1$ .

**Figure SM5** Transition probabilities from various states determined by frequencies in the test set. Each row corresponds to an initial state, and the columns correspond to the patient’s state on the following day. States are displayed in the format “Yes/Maybe/No group (# prescribed barriers).” Dashed lines are shown for visual reference in order to group states in Yes/Maybe/No groups. “(Discharge)” is treated as an absorbing state. The initial (day zero) state percentages are shown on the left for reference.

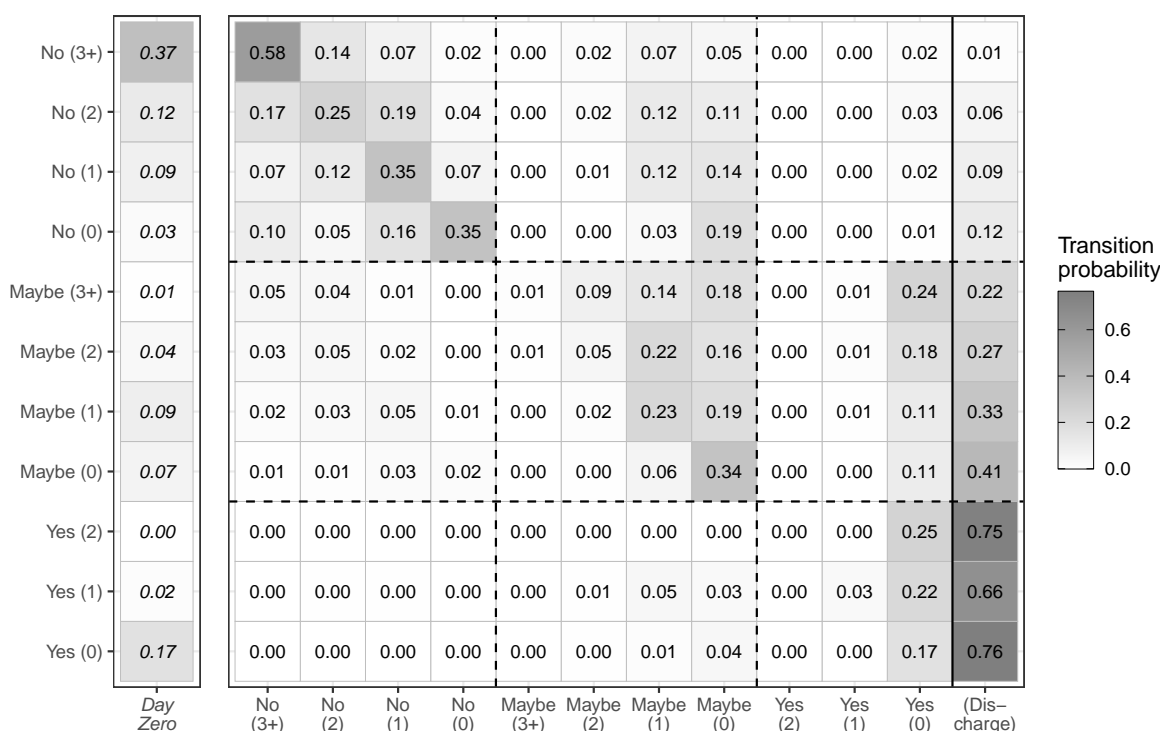

This graphical representation provides an easy way for non-technical users to understand how patients evolve with respect to prescribed barriers during their stay. For example:

- We see that YES patients frequently discharge from their current state, with the second most frequent being a transition to “YES (0 prescribed).”
- For NO patients with three or more prescribed barriers, we also observe that they are most likely to stay in that state the following day (58% probability).

- For MAYBE patients, the most likely subsequent state is “Discharged” whenever 0, 1, or 2 barriers are prescribed, where it is “YES (0 prescribed)” when 3 or more are prescribed. Further, when MAYBE patients stay in a MAYBE state on the subsequent day it tends to be one with the **same number or fewer** prescribed barriers.

The initial starting frequencies also match intuition: the most frequent state on day zero is “No (3+ prescribed)” (at 36.8%), while the second most frequent is “YES (0 prescribed),” highlighting the heterogeneous patient population under consideration.

## 8. Improvements to complete enumeration

Because of variation in the underlying resolution likelihood scores, it is typically not necessary to enumerate *all* subsets of a given patient’s open barriers in order to compute the optimal value  $J^*$ , so long as one has chosen a value of  $J_{\min}$  sufficiently large. To illustrate this point, let us consider an observation (patient-day) with  $b$  open barriers with resolution likelihoods  $L_1, \dots, L_b \in [0, 1]$ . Instead of considering all  $2^b$  possible subsets of open barriers to compute  $J^*$ , we can instead provide an upper bound on the size of subsets that need to be considered if one is only interested in identifying observations with  $J^* > J_{\min}$ , where  $J_{\min}$  is fixed *a priori*. To do so, let  $L_{(1)} \geq L_{(2)} \geq \dots \geq L_{(b)}$  denote the sorted values of  $L_1, \dots, L_b$ ; then one must only consider subsets of the  $b$  barriers up to size  $\bar{k}_{J_{\min}}$  defined as

$$\bar{k}_{J_{\min}} := \max \left\{ k : 0 \leq k \leq b, \prod_{i=1}^k L_{(i)} > J_{\min} \right\}.$$

(If  $L_{(1)} \leq J_{\min}$ , we define this quantity as 0.) This is a valid upper bound because any subset of  $k > \bar{k}_{J_{\min}}$  barriers necessarily has  $J_2 \leq J_{\min}$  and hence  $J \leq J_{\min}$ .

To illustrate how  $\bar{k}_{J_{\min}}$  behaves as a function of the number of open barriers  $b$ , we show its average value (over the test set observations) in Figure SM4. Not surprisingly, if  $J_{\min} = 0$ , then  $\bar{k}_0 = b$  whenever a patient has  $b$  open barriers (since the likelihoods are always strictly positive). For the choice of  $J_{\min} = 0.5$  which is advocated for in the main text, we see that  $\bar{k}_{0.5}$  is appreciably smaller than the number of open barriers on average; for example, for patients with 20 open barriers, the average value of  $\bar{k}_{0.5}$  is around 4 barriers. Note that the behavior observed in this plot (and for  $\bar{k}_{J_{\min}}$  more generally) is highly dependent upon the underlying resolution likelihoods. We noted earlier that the resolution likelihoods in our setting are commonly well below 1, suggesting that this simple adjustment to complete enumeration can be effective.

To further assess this claim, we also evaluated how  $\bar{k}_{J_{\min}}$  evolves as a function of  $J_{\min}$ ; the corresponding results are shown in Figure SM5. For the choice of  $J_{\min} = 0.5$ , we see that the average value of  $\bar{k}_{0.5}$  across all test set observations is approximately 2.5 barriers, while the maximum is 14 barriers. If one uses this choice of  $\bar{k}$  to enumerate all possible subsets of at most  $\bar{k}$  barriers, then

**Figure SM4** Average value of  $\bar{k}_{J_{\min}}$  for  $J_{\min} \in \{0, 0.25, 0.5, .0.75\}$  as a function of the number of open barriers.

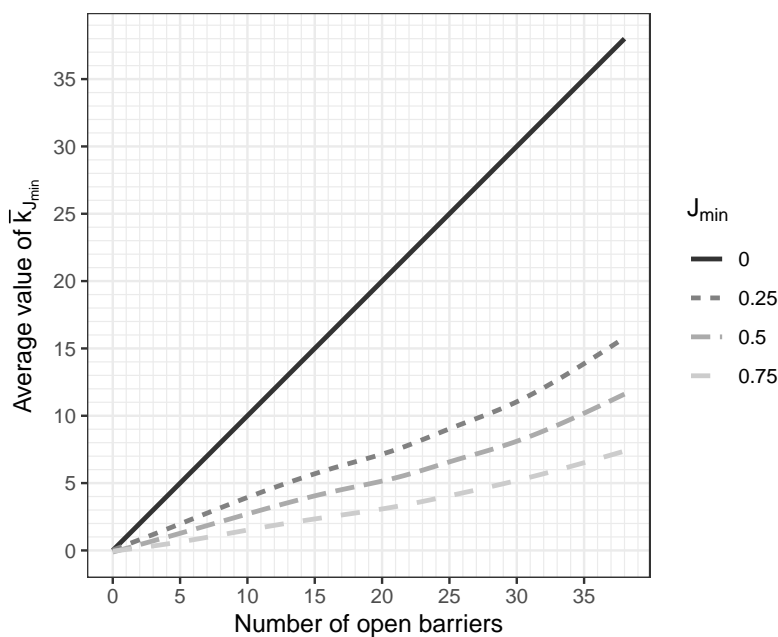

the number of subsets is on the order of  $2^{20} \approx 10^6$  on average. Each subset requires computing the value of  $J_1$  based on changes to that subset of barriers, and this is easy to do. **Therefore, an enumerative approach is feasible in our setting for the choice  $J_{\min} = 0.5$ .** (The important caveat, of course, is this relies on having performed a full analysis already which identified the choice of  $J_{\min}$ .)

**Table SM4 Final list of all 96 barriers included in the prescriptive model**

| Barrier                                   | Barrier                                                |
|-------------------------------------------|--------------------------------------------------------|
| Addiction Services consult is needed      | GI Tube in place                                       |
| Anesthesiology consult is needed          | Negative Pressure Wound Therapy in place               |
| Cardiology consult is needed              | Open Surgical Wound in place                           |
| Endocrinology consult is needed           | Penrose Drain in place                                 |
| Gastroenterology consult is needed        | PICC line in place                                     |
| General Surgery consult is needed         | Suction Drain in place                                 |
| Infectious Diseases consult is needed     | Urinary Catheter in place                              |
| Internal Medicine consult is needed       | On Antiemetic medication                               |
| Nephrology consult is needed              | On Antipsychotic medication                            |
| Neurology consult is needed               | On Colonoscopy Prep medication                         |
| Nutrition Services consult is needed      | On Diuretic medication                                 |
| Oncology consult is needed                | On Heparin medication                                  |
| Pain Management consult is needed         | On IV Antibiotic medication                            |
| Physical Medicine Rehab consult is needed | On IV Narcotic medication                              |
| Psychiatry consult is needed              | On Nebulized medication                                |
| Social Work consult is needed             | On PO Narcotic medication                              |
| Irregular diet                            | On Steroids                                            |
| Pending Cath Lab                          | On Tamsulosin                                          |
| Pending Echocardiogram                    | On Warfarin                                            |
| Abnormal blood pressure                   | Anaerobic microbiology test is pending                 |
| Abnormal cardiac rhythm                   | Blood microbiology test is pending                     |
| Cognition: Unable to follow command       | CSF microbiology test is pending                       |
| Emesis Occurred                           | Fluid (Not CSF) microbiology test is pending           |
| Level of consciousness: Not alert         | Fluid Culture Smear microbiology test is pending       |
| Oxygen device in place                    | Fungal microbiology test is pending                    |
| Orientation level: Disoriented            | Tissue microbiology test is pending                    |
| High pain                                 | Urine microbiology test is pending                     |
| Not passing flatus                        | Wound microbiology test is pending                     |
| Irregular pulse                           | Red Blood Cells bloodwork is pending                   |
| Irregular respiration                     | Plasma bloodwork is pending                            |
| Speech problems                           | Platelets bloodwork is pending                         |
| No stool occurrence                       | PT evaluation: has activity problems                   |
| No urine occurrence                       | PT evaluation: needs ambulation assistance             |
| MRI study is needed                       | PT evaluation: needs sit to stand level of assistance  |
| X-Ray study is needed                     | PT evaluation: has soft restraint on left wrist        |
| CT study is needed                        | PT evaluation: has soft restraint on right wrist       |
| Ultrasound study is needed                | PT evaluation: stand to sit device used                |
| Other imaging study is needed             | PT evaluation: needs stand to sit level of assistance  |
| High Creatinine level                     | PT evaluation: needs supine to sit level of assistance |
| High Glucose level                        | Final PT dispo recommendation is pending               |
| Low Glucose level                         | Final OT dispo recommendation is pending               |
| High INR value                            | SLP evaluation: Clinical Swallow Pharyngeal Phase      |
| High Potassium level                      | SLP evaluation: Clinical Swallow Response              |
| High Lactate level                        | SLP evaluation: Swallowing recommendation              |
| Low Sodium level                          | SLP evaluation: Medication recommendation              |
| High White Blood Cells count              | Final SLP dispo recommendation is pending              |
| Biliary Drain in place                    | Acceptance for post-discharge Facility bed is pending  |
| Chest Tube in place                       | Acceptance for post-discharge Home Services is pending |

**Figure SM5 Behavior of  $\bar{k}_{J_{\min}}$  as a function of  $J_{\min}$  and corresponding number of computations required using this upper bound. Mean, 99th percentile (shown as “99%ile”), and max are across all test set observations.**

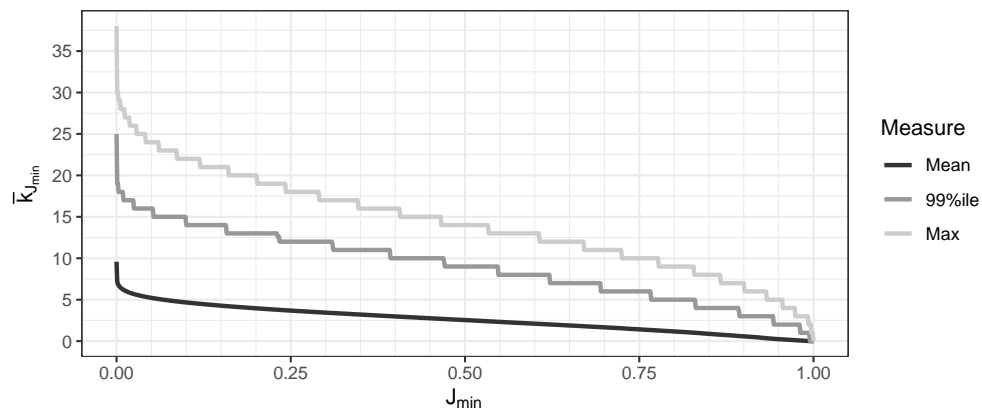

(a)  $\bar{k}_{J_{\min}}$  as function of  $J_{\min}$ .

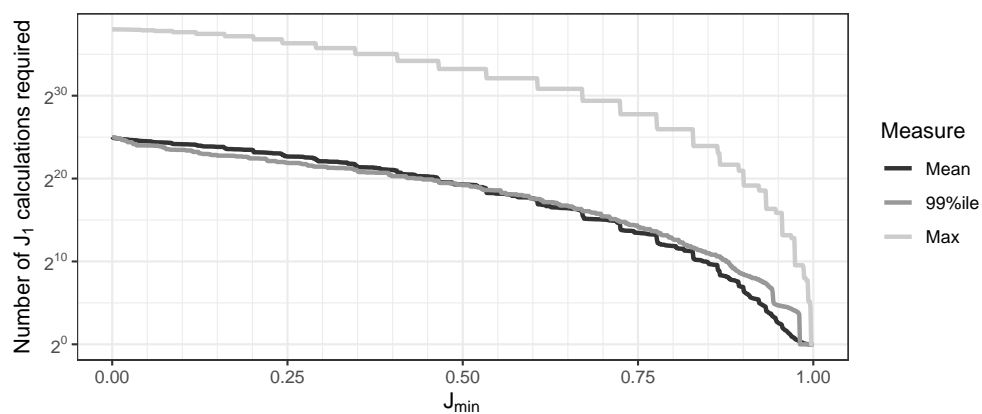

(b) Number of calculations of  $J_1$  required (based on upper bound  $\bar{k}_{J_{\min}}$ ); note the logarithmic scale.
